# Supplementary material for: Social security cuts and life expectancy: a longitudinal analysis of local authorities in England, Scotland and Wales
Source: HighWire-hosted journal article supplement (doi:10.1136/jech-2023-220328), 2023-11-07
Supplement: jech-2023-220328supp001_data_supplement.pdf [file jech-2023-220328supp001_data_supplement.pdf]

| ons_code_ | council_na   | years_welf | years_welf | years_welf | cuml_loss | tier_code_upper |
|-----------|--------------|------------|------------|------------|-----------|-----------------|
| S12000033 | Aberdeen (   | 2011_2012  | 2011       | 2012       | 38.89843  | S12             |
| S12000033 | Aberdeen (   | 2012_2013  | 2012       | 2013       | 94.99356  | S12             |
| S12000033 | Aberdeen (   | 2013_2014  | 2013       | 2014       | 160.2946  | S12             |
| S12000033 | Aberdeen (   | 2014_2015  | 2014       | 2015       | 209.3292  | S12             |
| S12000033 | Aberdeen (   | 2015_2016  | 2015       | 2016       | 251.9588  | S12             |
| S12000034 | Aberdeensl   | 2011_2012  | 2011       | 2012       | 39.17534  | S12             |
| S12000034 | Aberdeensl   | 2012_2013  | 2012       | 2013       | 98.87555  | S12             |
| S12000034 | Aberdeensl   | 2013_2014  | 2013       | 2014       | 169.0585  | S12             |
| S12000034 | Aberdeensl   | 2014_2015  | 2014       | 2015       | 214.4214  | S12             |
| S12000034 | Aberdeensl   | 2015_2016  | 2015       | 2016       | 253.5752  | S12             |
| S12000041 | Angus        | 2011_2012  | 2011       | 2012       | 61.52832  | S12             |
| S12000041 | Angus        | 2012_2013  | 2012       | 2013       | 149.1515  | S12             |
| S12000041 | Angus        | 2013_2014  | 2013       | 2014       | 238.8887  | S12             |
| S12000041 | Angus        | 2014_2015  | 2014       | 2015       | 309.3605  | S12             |
| S12000041 | Angus        | 2015_2016  | 2015       | 2016       | 371.9224  | S12             |
| S12000035 | Argyll and f | 2011_2012  | 2011       | 2012       | 66.96799  | S12             |
| S12000035 | Argyll and f | 2012_2013  | 2012       | 2013       | 162.9101  | S12             |
| S12000035 | Argyll and f | 2013_2014  | 2013       | 2014       | 257.7734  | S12             |
| S12000035 | Argyll and f | 2014_2015  | 2014       | 2015       | 334.8902  | S12             |
| S12000035 | Argyll and f | 2015_2016  | 2015       | 2016       | 403.9129  | S12             |
| E09000002 | Barking and  | 2011_2012  | 2011       | 2012       | 100.558   | E09             |
| E09000002 | Barking and  | 2012_2013  | 2012       | 2013       | 243.423   | E09             |
| E09000002 | Barking and  | 2013_2014  | 2013       | 2014       | 424.8639  | E09             |
| E09000002 | Barking and  | 2014_2015  | 2014       | 2015       | 542.8975  | E09             |
| E09000002 | Barking and  | 2015_2016  | 2015       | 2016       | 648.3168  | E09             |
| E09000003 | Barnet       | 2011_2012  | 2011       | 2012       | 70.68915  | E09             |
| E09000003 | Barnet       | 2012_2013  | 2012       | 2013       | 175.3044  | E09             |
| E09000003 | Barnet       | 2013_2014  | 2013       | 2014       | 298.9793  | E09             |
| E09000003 | Barnet       | 2014_2015  | 2014       | 2015       | 385.3704  | E09             |
| E09000003 | Barnet       | 2015_2016  | 2015       | 2016       | 461.8092  | E09             |
| E08000016 | Barnsley     | 2011_2012  | 2011       | 2012       | 81.65192  | E08             |
| E08000016 | Barnsley     | 2012_2013  | 2012       | 2013       | 195.1968  | E08             |
| E08000016 | Barnsley     | 2013_2014  | 2013       | 2014       | 345.6378  | E08             |
| E08000016 | Barnsley     | 2014_2015  | 2014       | 2015       | 443.9361  | E08             |
| E08000016 | Barnsley     | 2015_2016  | 2015       | 2016       | 533.7094  | E08             |
| E06000022 | Bath and N   | 2011_2012  | 2011       | 2012       | 49.51944  | E06             |
| E06000022 | Bath and N   | 2012_2013  | 2012       | 2013       | 121.9869  | E06             |
| E06000022 | Bath and N   | 2013_2014  | 2013       | 2014       | 210.4278  | E06             |
| E06000022 | Bath and N   | 2014_2015  | 2014       | 2015       | 265.03    | E06             |
| E06000022 | Bath and N   | 2015_2016  | 2015       | 2016       | 314.4542  | E06             |
| E06000055 | Bedford UA   | 2011_2012  | 2011       | 2012       | 66.23659  | E06             |
| E06000055 | Bedford UA   | 2012_2013  | 2012       | 2013       | 161.9693  | E06             |
| E06000055 | Bedford UA   | 2013_2014  | 2013       | 2014       | 268.4435  | E06             |
| E06000055 | Bedford UA   | 2014_2015  | 2014       | 2015       | 343.9688  | E06             |
| E06000055 | Bedford UA   | 2015_2016  | 2015       | 2016       | 410.782   | E06             |
| E09000004 | Bexley       | 2011_2012  | 2011       | 2012       | 62.94261  | E09             |

|                       |           |      |      |          |     |
|-----------------------|-----------|------|------|----------|-----|
| E09000004 Bexley      | 2012_2013 | 2012 | 2013 | 157.4371 | E09 |
| E09000004 Bexley      | 2013_2014 | 2013 | 2014 | 278.9911 | E09 |
| E09000004 Bexley      | 2014_2015 | 2014 | 2015 | 352.7625 | E09 |
| E09000004 Bexley      | 2015_2016 | 2015 | 2016 | 417.4805 | E09 |
| E08000025 Birmingham  | 2011_2012 | 2011 | 2012 | 91.99744 | E08 |
| E08000025 Birmingham  | 2012_2013 | 2012 | 2013 | 219.7203 | E08 |
| E08000025 Birmingham  | 2013_2014 | 2013 | 2014 | 373.6919 | E08 |
| E08000025 Birmingham  | 2014_2015 | 2014 | 2015 | 481.4128 | E08 |
| E08000025 Birmingham  | 2015_2016 | 2015 | 2016 | 579.1934 | E08 |
| E06000008 Blackburn \ | 2011_2012 | 2011 | 2012 | 103.188  | E06 |
| E06000008 Blackburn \ | 2012_2013 | 2012 | 2013 | 245.1272 | E06 |
| E06000008 Blackburn \ | 2013_2014 | 2013 | 2014 | 411.6976 | E06 |
| E06000008 Blackburn \ | 2014_2015 | 2014 | 2015 | 531.0016 | E06 |
| E06000008 Blackburn \ | 2015_2016 | 2015 | 2016 | 639.6722 | E06 |
| E06000009 Blackpool \ | 2011_2012 | 2011 | 2012 | 154.3661 | E06 |
| E06000009 Blackpool \ | 2012_2013 | 2012 | 2013 | 369.5128 | E06 |
| E06000009 Blackpool \ | 2013_2014 | 2013 | 2014 | 586.9408 | E06 |
| E06000009 Blackpool \ | 2014_2015 | 2014 | 2015 | 761.4153 | E06 |
| E06000009 Blackpool \ | 2015_2016 | 2015 | 2016 | 925.1201 | E06 |
| W0600001 Blaenau Gv   | 2011_2012 | 2011 | 2012 | 89.93872 | W06 |
| W0600001 Blaenau Gv   | 2012_2013 | 2012 | 2013 | 211.8267 | W06 |
| W0600001 Blaenau Gv   | 2013_2014 | 2013 | 2014 | 360.8754 | W06 |
| W0600001 Blaenau Gv   | 2014_2015 | 2014 | 2015 | 477.8536 | W06 |
| W0600001 Blaenau Gv   | 2015_2016 | 2015 | 2016 | 582.4427 | W06 |
| E08000001 Bolton      | 2011_2012 | 2011 | 2012 | 90.12256 | E08 |
| E08000001 Bolton      | 2012_2013 | 2012 | 2013 | 215.5491 | E08 |
| E08000001 Bolton      | 2013_2014 | 2013 | 2014 | 348.8453 | E08 |
| E08000001 Bolton      | 2014_2015 | 2014 | 2015 | 451.7729 | E08 |
| E08000001 Bolton      | 2015_2016 | 2015 | 2016 | 543.4723 | E08 |
| E06000036 Bracknell F | 2011_2012 | 2011 | 2012 | 44.56049 | E06 |
| E06000036 Bracknell F | 2012_2013 | 2012 | 2013 | 113.7302 | E06 |
| E06000036 Bracknell F | 2013_2014 | 2013 | 2014 | 205.1282 | E06 |
| E06000036 Bracknell F | 2014_2015 | 2014 | 2015 | 256.1604 | E06 |
| E06000036 Bracknell F | 2015_2016 | 2015 | 2016 | 300.3872 | E06 |
| E08000032 Bradford    | 2011_2012 | 2011 | 2012 | 98.77539 | E08 |
| E08000032 Bradford    | 2012_2013 | 2012 | 2013 | 236.3879 | E08 |
| E08000032 Bradford    | 2013_2014 | 2013 | 2014 | 391.2256 | E08 |
| E08000032 Bradford    | 2014_2015 | 2014 | 2015 | 501.6872 | E08 |
| E08000032 Bradford    | 2015_2016 | 2015 | 2016 | 602.5812 | E08 |
| E09000005 Brent       | 2011_2012 | 2011 | 2012 | 113.3407 | E09 |
| E09000005 Brent       | 2012_2013 | 2012 | 2013 | 277.7655 | E09 |
| E09000005 Brent       | 2013_2014 | 2013 | 2014 | 448.3872 | E09 |
| E09000005 Brent       | 2014_2015 | 2014 | 2015 | 577.8933 | E09 |
| E09000005 Brent       | 2015_2016 | 2015 | 2016 | 691.5016 | E09 |
| W0600001 Bridgend /   | 2011_2012 | 2011 | 2012 | 81.51916 | W06 |
| W0600001 Bridgend /   | 2012_2013 | 2012 | 2013 | 194.7959 | W06 |
| W0600001 Bridgend /   | 2013_2014 | 2013 | 2014 | 318.0206 | W06 |

|                                   |      |      |          |     |
|-----------------------------------|------|------|----------|-----|
| W0600001 Bridgend / 2014_2015     | 2014 | 2015 | 417.5028 | W06 |
| W0600001 Bridgend / 2015_2016     | 2015 | 2016 | 506.7635 | W06 |
| E06000043 Brighton ar 2011_2012   | 2011 | 2012 | 81.66409 | E06 |
| E06000043 Brighton ar 2012_2013   | 2012 | 2013 | 200.7573 | E06 |
| E06000043 Brighton ar 2013_2014   | 2013 | 2014 | 319.0968 | E06 |
| E06000043 Brighton ar 2014_2015   | 2014 | 2015 | 408.3782 | E06 |
| E06000043 Brighton ar 2015_2016   | 2015 | 2016 | 490.3173 | E06 |
| E06000023 Bristol, City 2011_2012 | 2011 | 2012 | 66.87062 | E06 |
| E06000023 Bristol, City 2012_2013 | 2012 | 2013 | 161.8225 | E06 |
| E06000023 Bristol, City 2013_2014 | 2013 | 2014 | 264.7147 | E06 |
| E06000023 Bristol, City 2014_2015 | 2014 | 2015 | 344.4146 | E06 |
| E06000023 Bristol, City 2015_2016 | 2015 | 2016 | 415.8553 | E06 |
| E09000006 Bromley 2011_2012       | 2011 | 2012 | 54.41931 | E09 |
| E09000006 Bromley 2012_2013       | 2012 | 2013 | 138.601  | E09 |
| E09000006 Bromley 2013_2014       | 2013 | 2014 | 253.8969 | E09 |
| E09000006 Bromley 2014_2015       | 2014 | 2015 | 318.4547 | E09 |
| E09000006 Bromley 2015_2016       | 2015 | 2016 | 375.1348 | E09 |
| E10000002 Buckinghar 2011_2012    | 2011 | 2012 | 47.77106 | E10 |
| E10000002 Buckinghar 2012_2013    | 2012 | 2013 | 122.0863 | E10 |
| E10000002 Buckinghar 2013_2014    | 2013 | 2014 | 216.9818 | E10 |
| E10000002 Buckinghar 2014_2015    | 2014 | 2015 | 267.1372 | E10 |
| E10000002 Buckinghar 2015_2016    | 2015 | 2016 | 309.4807 | E10 |
| E08000002 Bury 2011_2012          | 2011 | 2012 | 79.53397 | E08 |
| E08000002 Bury 2012_2013          | 2012 | 2013 | 193.114  | E08 |
| E08000002 Bury 2013_2014          | 2013 | 2014 | 315.3897 | E08 |
| E08000002 Bury 2014_2015          | 2014 | 2015 | 407.0955 | E08 |
| E08000002 Bury 2015_2016          | 2015 | 2016 | 488.8775 | E08 |
| W0600001 Caerphilly / 2011_2012   | 2011 | 2012 | 83.89969 | W06 |
| W0600001 Caerphilly / 2012_2013   | 2012 | 2013 | 200.3696 | W06 |
| W0600001 Caerphilly / 2013_2014   | 2013 | 2014 | 338.423  | W06 |
| W0600001 Caerphilly / 2014_2015   | 2014 | 2015 | 442.4372 | W06 |
| W0600001 Caerphilly / 2015_2016   | 2015 | 2016 | 535.1151 | W06 |
| E08000033 Calderdale 2011_2012    | 2011 | 2012 | 83.57181 | E08 |
| E08000033 Calderdale 2012_2013    | 2012 | 2013 | 201.9191 | E08 |
| E08000033 Calderdale 2013_2014    | 2013 | 2014 | 338.2818 | E08 |
| E08000033 Calderdale 2014_2015    | 2014 | 2015 | 433.9366 | E08 |
| E08000033 Calderdale 2015_2016    | 2015 | 2016 | 520.8626 | E08 |
| E10000003 Cambridge: 2011_2012    | 2011 | 2012 | 48.57607 | E10 |
| E10000003 Cambridge: 2012_2013    | 2012 | 2013 | 122.1526 | E10 |
| E10000003 Cambridge: 2013_2014    | 2013 | 2014 | 213.9088 | E10 |
| E10000003 Cambridge: 2014_2015    | 2014 | 2015 | 267.7597 | E10 |
| E10000003 Cambridge: 2015_2016    | 2015 | 2016 | 314.0698 | E10 |
| E09000007 Camden 2011_2012        | 2011 | 2012 | 64.73425 | E09 |
| E09000007 Camden 2012_2013        | 2012 | 2013 | 161.3525 | E09 |
| E09000007 Camden 2013_2014        | 2013 | 2014 | 269.6202 | E09 |
| E09000007 Camden 2014_2015        | 2014 | 2015 | 342.3626 | E09 |
| E09000007 Camden 2015_2016        | 2015 | 2016 | 406.8331 | E09 |

|                                 |      |      |          |     |
|---------------------------------|------|------|----------|-----|
| W0600001 Cardiff / Ca 2011_2012 | 2011 | 2012 | 70.07104 | W06 |
| W0600001 Cardiff / Ca 2012_2013 | 2012 | 2013 | 168.8793 | W06 |
| W0600001 Cardiff / Ca 2013_2014 | 2013 | 2014 | 278.4572 | W06 |
| W0600001 Cardiff / Ca 2014_2015 | 2014 | 2015 | 362.6288 | W06 |
| W0600001 Cardiff / Ca 2015_2016 | 2015 | 2016 | 437.3081 | W06 |
| W0600001 Carmarthei 2011_2012   | 2011 | 2012 | 80.03774 | W06 |
| W0600001 Carmarthei 2012_2013   | 2012 | 2013 | 191.0215 | W06 |
| W0600001 Carmarthei 2013_2014   | 2013 | 2014 | 313.1065 | W06 |
| W0600001 Carmarthei 2014_2015   | 2014 | 2015 | 407.7925 | W06 |
| W0600001 Carmarthei 2015_2016   | 2015 | 2016 | 492.4865 | W06 |
| E06000056 Central Bec 2011_2012 | 2011 | 2012 | 48.46882 | E06 |
| E06000056 Central Bec 2012_2013 | 2012 | 2013 | 121.5415 | E06 |
| E06000056 Central Bec 2013_2014 | 2013 | 2014 | 221.4742 | E06 |
| E06000056 Central Bec 2014_2015 | 2014 | 2015 | 276.0334 | E06 |
| E06000056 Central Bec 2015_2016 | 2015 | 2016 | 324.5129 | E06 |
| W0600000 Ceredigion 2011_2012   | 2011 | 2012 | 74.41225 | W06 |
| W0600000 Ceredigion 2012_2013   | 2012 | 2013 | 178.143  | W06 |
| W0600000 Ceredigion 2013_2014   | 2013 | 2014 | 279.439  | W06 |
| W0600000 Ceredigion 2014_2015   | 2014 | 2015 | 361.6728 | W06 |
| W0600000 Ceredigion 2015_2016   | 2015 | 2016 | 435.6762 | W06 |
| E06000049 Cheshire E; 2011_2012 | 2011 | 2012 | 56.97158 | E06 |
| E06000049 Cheshire E; 2012_2013 | 2012 | 2013 | 140.4624 | E06 |
| E06000049 Cheshire E; 2013_2014 | 2013 | 2014 | 242.3283 | E06 |
| E06000049 Cheshire E; 2014_2015 | 2014 | 2015 | 305.4708 | E06 |
| E06000049 Cheshire E; 2015_2016 | 2015 | 2016 | 362.0304 | E06 |
| E06000050 Cheshire W 2011_2012  | 2011 | 2012 | 62.87729 | E06 |
| E06000050 Cheshire W 2012_2013  | 2012 | 2013 | 153.5181 | E06 |
| E06000050 Cheshire W 2013_2014  | 2013 | 2014 | 271.7827 | E06 |
| E06000050 Cheshire W 2014_2015  | 2014 | 2015 | 344.6576 | E06 |
| E06000050 Cheshire W 2015_2016  | 2015 | 2016 | 410.6534 | E06 |
| S12000005 Clackmann 2011_2012   | 2011 | 2012 | 72.46834 | S12 |
| S12000005 Clackmann 2012_2013   | 2012 | 2013 | 173.3084 | S12 |
| S12000005 Clackmann 2013_2014   | 2013 | 2014 | 285.728  | S12 |
| S12000005 Clackmann 2014_2015   | 2014 | 2015 | 381.2351 | S12 |
| S12000005 Clackmann 2015_2016   | 2015 | 2016 | 464.2357 | S12 |
| W0600000 Conwy / Cc 2011_2012   | 2011 | 2012 | 90.99086 | W06 |
| W0600000 Conwy / Cc 2012_2013   | 2012 | 2013 | 217.5616 | W06 |
| W0600000 Conwy / Cc 2013_2014   | 2013 | 2014 | 340.4285 | W06 |
| W0600000 Conwy / Cc 2014_2015   | 2014 | 2015 | 442.9515 | W06 |
| W0600000 Conwy / Cc 2015_2016   | 2015 | 2016 | 535.4251 | W06 |
| E06000052 Cornwall U 2011_2012  | 2011 | 2012 | 80.1252  | E06 |
| E06000052 Cornwall U 2012_2013  | 2012 | 2013 | 192.1334 | E06 |
| E06000052 Cornwall U 2013_2014  | 2013 | 2014 | 319.4021 | E06 |
| E06000052 Cornwall U 2014_2015  | 2014 | 2015 | 409.7224 | E06 |
| E06000052 Cornwall U 2015_2016  | 2015 | 2016 | 492.9727 | E06 |
| E06000047 County Dur 2011_2012  | 2011 | 2012 | 80.2258  | E06 |
| E06000047 County Dur 2012_2013  | 2012 | 2013 | 192.6149 | E06 |

|           |            |           |      |      |          |     |
|-----------|------------|-----------|------|------|----------|-----|
| E06000047 | County Dur | 2013_2014 | 2013 | 2014 | 318.2709 | E06 |
| E06000047 | County Dur | 2014_2015 | 2014 | 2015 | 413.704  | E06 |
| E06000047 | County Dur | 2015_2016 | 2015 | 2016 | 499.2954 | E06 |
| E08000026 | Coventry   | 2011_2012 | 2011 | 2012 | 77.8263  | E08 |
| E08000026 | Coventry   | 2012_2013 | 2012 | 2013 | 188.2214 | E08 |
| E08000026 | Coventry   | 2013_2014 | 2013 | 2014 | 300.2644 | E08 |
| E08000026 | Coventry   | 2014_2015 | 2014 | 2015 | 387.3848 | E08 |
| E08000026 | Coventry   | 2015_2016 | 2015 | 2016 | 465.5505 | E08 |
| E09000008 | Croydon    | 2011_2012 | 2011 | 2012 | 87.52382 | E09 |
| E09000008 | Croydon    | 2012_2013 | 2012 | 2013 | 215.5408 | E09 |
| E09000008 | Croydon    | 2013_2014 | 2013 | 2014 | 368.3991 | E09 |
| E09000008 | Croydon    | 2014_2015 | 2014 | 2015 | 470.2936 | E09 |
| E09000008 | Croydon    | 2015_2016 | 2015 | 2016 | 562.171  | E09 |
| E10000006 | Cumbria    | 2011_2012 | 2011 | 2012 | 63.69909 | E10 |
| E10000006 | Cumbria    | 2012_2013 | 2012 | 2013 | 155.3138 | E10 |
| E10000006 | Cumbria    | 2013_2014 | 2013 | 2014 | 261.779  | E10 |
| E10000006 | Cumbria    | 2014_2015 | 2014 | 2015 | 340.1539 | E10 |
| E10000006 | Cumbria    | 2015_2016 | 2015 | 2016 | 410.8556 | E10 |
| E06000005 | Darlington | 2011_2012 | 2011 | 2012 | 88.57331 | E06 |
| E06000005 | Darlington | 2012_2013 | 2012 | 2013 | 213.1159 | E06 |
| E06000005 | Darlington | 2013_2014 | 2013 | 2014 | 353.0609 | E06 |
| E06000005 | Darlington | 2014_2015 | 2014 | 2015 | 453.3683 | E06 |
| E06000005 | Darlington | 2015_2016 | 2015 | 2016 | 545.212  | E06 |
| W0600000  | Denbighshi | 2011_2012 | 2011 | 2012 | 90.65678 | W06 |
| W0600000  | Denbighshi | 2012_2013 | 2012 | 2013 | 216.4654 | W06 |
| W0600000  | Denbighshi | 2013_2014 | 2013 | 2014 | 344.9919 | W06 |
| W0600000  | Denbighshi | 2014_2015 | 2014 | 2015 | 453.0562 | W06 |
| W0600000  | Denbighshi | 2015_2016 | 2015 | 2016 | 550.2805 | W06 |
| E06000015 | Derby UA   | 2011_2012 | 2011 | 2012 | 81.10015 | E06 |
| E06000015 | Derby UA   | 2012_2013 | 2012 | 2013 | 195.3146 | E06 |
| E06000015 | Derby UA   | 2013_2014 | 2013 | 2014 | 333.2738 | E06 |
| E06000015 | Derby UA   | 2014_2015 | 2014 | 2015 | 427.546  | E06 |
| E06000015 | Derby UA   | 2015_2016 | 2015 | 2016 | 512.4772 | E06 |
| E10000007 | Derbyshire | 2011_2012 | 2011 | 2012 | 65.75749 | E10 |
| E10000007 | Derbyshire | 2012_2013 | 2012 | 2013 | 160.6779 | E10 |
| E10000007 | Derbyshire | 2013_2014 | 2013 | 2014 | 270.707  | E10 |
| E10000007 | Derbyshire | 2014_2015 | 2014 | 2015 | 347.1842 | E10 |
| E10000007 | Derbyshire | 2015_2016 | 2015 | 2016 | 415.691  | E10 |
| E10000008 | Devon      | 2011_2012 | 2011 | 2012 | 68.49664 | E10 |
| E10000008 | Devon      | 2012_2013 | 2012 | 2013 | 166.2527 | E10 |
| E10000008 | Devon      | 2013_2014 | 2013 | 2014 | 274.5258 | E10 |
| E10000008 | Devon      | 2014_2015 | 2014 | 2015 | 349.0348 | E10 |
| E10000008 | Devon      | 2015_2016 | 2015 | 2016 | 414.9039 | E10 |
| E08000017 | Doncaster  | 2011_2012 | 2011 | 2012 | 87.01232 | E08 |
| E08000017 | Doncaster  | 2012_2013 | 2012 | 2013 | 208.5108 | E08 |
| E08000017 | Doncaster  | 2013_2014 | 2013 | 2014 | 336.98   | E08 |
| E08000017 | Doncaster  | 2014_2015 | 2014 | 2015 | 437.6844 | E08 |

|           |             |           |      |      |          |     |
|-----------|-------------|-----------|------|------|----------|-----|
| E08000017 | Doncaster   | 2015_2016 | 2015 | 2016 | 528.5096 | E08 |
| E08000027 | Dudley      | 2011_2012 | 2011 | 2012 | 74.38458 | E08 |
| E08000027 | Dudley      | 2012_2013 | 2012 | 2013 | 178.79   | E08 |
| E08000027 | Dudley      | 2013_2014 | 2013 | 2014 | 306.7509 | E08 |
| E08000027 | Dudley      | 2014_2015 | 2014 | 2015 | 392.4521 | E08 |
| E08000027 | Dudley      | 2015_2016 | 2015 | 2016 | 470.0937 | E08 |
| S12000006 | Dumfries a  | 2011_2012 | 2011 | 2012 | 71.78942 | S12 |
| S12000006 | Dumfries a  | 2012_2013 | 2012 | 2013 | 171.2004 | S12 |
| S12000006 | Dumfries a  | 2013_2014 | 2013 | 2014 | 268.5162 | S12 |
| S12000006 | Dumfries a  | 2014_2015 | 2014 | 2015 | 351.5755 | S12 |
| S12000006 | Dumfries a  | 2015_2016 | 2015 | 2016 | 426.3305 | S12 |
| S12000042 | Dundee Cit  | 2011_2012 | 2011 | 2012 | 78.92878 | S12 |
| S12000042 | Dundee Cit  | 2012_2013 | 2012 | 2013 | 187.0052 | S12 |
| S12000042 | Dundee Cit  | 2013_2014 | 2013 | 2014 | 295.7824 | S12 |
| S12000042 | Dundee Cit  | 2014_2015 | 2014 | 2015 | 395.0974 | S12 |
| S12000042 | Dundee Cit  | 2015_2016 | 2015 | 2016 | 483.9326 | S12 |
| E09000009 | Ealing      | 2011_2012 | 2011 | 2012 | 88.67816 | E09 |
| E09000009 | Ealing      | 2012_2013 | 2012 | 2013 | 218.869  | E09 |
| E09000009 | Ealing      | 2013_2014 | 2013 | 2014 | 373.5146 | E09 |
| E09000009 | Ealing      | 2014_2015 | 2014 | 2015 | 480.3226 | E09 |
| E09000009 | Ealing      | 2015_2016 | 2015 | 2016 | 572.7478 | E09 |
| S12000008 | East Ayrshi | 2011_2012 | 2011 | 2012 | 78.29522 | S12 |
| S12000008 | East Ayrshi | 2012_2013 | 2012 | 2013 | 186.6181 | S12 |
| S12000008 | East Ayrshi | 2013_2014 | 2013 | 2014 | 297.8404 | S12 |
| S12000008 | East Ayrshi | 2014_2015 | 2014 | 2015 | 394.1829 | S12 |
| S12000008 | East Ayrshi | 2015_2016 | 2015 | 2016 | 480.2441 | S12 |
| S12000045 | East Dunba  | 2011_2012 | 2011 | 2012 | 45.11555 | S12 |
| S12000045 | East Dunba  | 2012_2013 | 2012 | 2013 | 113.4637 | S12 |
| S12000045 | East Dunba  | 2013_2014 | 2013 | 2014 | 193.9345 | S12 |
| S12000045 | East Dunba  | 2014_2015 | 2014 | 2015 | 247.472  | S12 |
| S12000045 | East Dunba  | 2015_2016 | 2015 | 2016 | 293.8032 | S12 |
| S12000010 | East Lothia | 2011_2012 | 2011 | 2012 | 60.23269 | S12 |
| S12000010 | East Lothia | 2012_2013 | 2012 | 2013 | 147.031  | S12 |
| S12000010 | East Lothia | 2013_2014 | 2013 | 2014 | 239.1261 | S12 |
| S12000010 | East Lothia | 2014_2015 | 2014 | 2015 | 308.9715 | S12 |
| S12000010 | East Lothia | 2015_2016 | 2015 | 2016 | 370.3586 | S12 |
| S12000011 | East Renfre | 2011_2012 | 2011 | 2012 | 47.15831 | S12 |
| S12000011 | East Renfre | 2012_2013 | 2012 | 2013 | 119.3695 | S12 |
| S12000011 | East Renfre | 2013_2014 | 2013 | 2014 | 204.8206 | S12 |
| S12000011 | East Renfre | 2014_2015 | 2014 | 2015 | 260.1475 | S12 |
| S12000011 | East Renfre | 2015_2016 | 2015 | 2016 | 307.9012 | S12 |
| E06000011 | East Riding | 2011_2012 | 2011 | 2012 | 65.71637 | E06 |
| E06000011 | East Riding | 2012_2013 | 2012 | 2013 | 160.8697 | E06 |
| E06000011 | East Riding | 2013_2014 | 2013 | 2014 | 271.136  | E06 |
| E06000011 | East Riding | 2014_2015 | 2014 | 2015 | 344.1262 | E06 |
| E06000011 | East Riding | 2015_2016 | 2015 | 2016 | 410.442  | E06 |
| E10000011 | East Sussex | 2011_2012 | 2011 | 2012 | 77.29533 | E10 |

|                       |           |      |      |          |     |
|-----------------------|-----------|------|------|----------|-----|
| E10000011 East Sussex | 2012_2013 | 2012 | 2013 | 188.7922 | E10 |
| E10000011 East Sussex | 2013_2014 | 2013 | 2014 | 300.3655 | E10 |
| E10000011 East Sussex | 2014_2015 | 2014 | 2015 | 386.6827 | E10 |
| E10000011 East Sussex | 2015_2016 | 2015 | 2016 | 463.7754 | E10 |
| S12000036 Edinburgh,  | 2011_2012 | 2011 | 2012 | 53.65873 | S12 |
| S12000036 Edinburgh,  | 2012_2013 | 2012 | 2013 | 131.0394 | S12 |
| S12000036 Edinburgh,  | 2013_2014 | 2013 | 2014 | 210.4447 | S12 |
| S12000036 Edinburgh,  | 2014_2015 | 2014 | 2015 | 275.4693 | S12 |
| S12000036 Edinburgh,  | 2015_2016 | 2015 | 2016 | 332.5815 | S12 |
| S12000013 Eilean Siar | 2011_2012 | 2011 | 2012 | 53.13102 | S12 |
| S12000013 Eilean Siar | 2012_2013 | 2012 | 2013 | 129.1117 | S12 |
| S12000013 Eilean Siar | 2013_2014 | 2013 | 2014 | 212.6279 | S12 |
| S12000013 Eilean Siar | 2014_2015 | 2014 | 2015 | 276.2572 | S12 |
| S12000013 Eilean Siar | 2015_2016 | 2015 | 2016 | 332.366  | S12 |
| E09000010 Enfield     | 2011_2012 | 2011 | 2012 | 105.7879 | E09 |
| E09000010 Enfield     | 2012_2013 | 2012 | 2013 | 257.4645 | E09 |
| E09000010 Enfield     | 2013_2014 | 2013 | 2014 | 434.726  | E09 |
| E09000010 Enfield     | 2014_2015 | 2014 | 2015 | 563.9041 | E09 |
| E09000010 Enfield     | 2015_2016 | 2015 | 2016 | 678.1522 | E09 |
| E10000012 Essex       | 2011_2012 | 2011 | 2012 | 60.91859 | E10 |
| E10000012 Essex       | 2012_2013 | 2012 | 2013 | 151.1829 | E10 |
| E10000012 Essex       | 2013_2014 | 2013 | 2014 | 265.5663 | E10 |
| E10000012 Essex       | 2014_2015 | 2014 | 2015 | 333.3042 | E10 |
| E10000012 Essex       | 2015_2016 | 2015 | 2016 | 393.9132 | E10 |
| S12000014 Falkirk     | 2011_2012 | 2011 | 2012 | 60.81667 | S12 |
| S12000014 Falkirk     | 2012_2013 | 2012 | 2013 | 147.0408 | S12 |
| S12000014 Falkirk     | 2013_2014 | 2013 | 2014 | 241.7619 | S12 |
| S12000014 Falkirk     | 2014_2015 | 2014 | 2015 | 316.6654 | S12 |
| S12000014 Falkirk     | 2015_2016 | 2015 | 2016 | 382.8048 | S12 |
| S12000015 Fife        | 2011_2012 | 2011 | 2012 | 68.53825 | S12 |
| S12000015 Fife        | 2012_2013 | 2012 | 2013 | 164.4218 | S12 |
| S12000015 Fife        | 2013_2014 | 2013 | 2014 | 265.5455 | S12 |
| S12000015 Fife        | 2014_2015 | 2014 | 2015 | 349.0818 | S12 |
| S12000015 Fife        | 2015_2016 | 2015 | 2016 | 423.0476 | S12 |
| W0600000 Flintshire / | 2011_2012 | 2011 | 2012 | 68.85043 | W06 |
| W0600000 Flintshire / | 2012_2013 | 2012 | 2013 | 166.9392 | W06 |
| W0600000 Flintshire / | 2013_2014 | 2013 | 2014 | 276.2567 | W06 |
| W0600000 Flintshire / | 2014_2015 | 2014 | 2015 | 355.4558 | W06 |
| W0600000 Flintshire / | 2015_2016 | 2015 | 2016 | 425.7557 | W06 |
| E08000037 Gateshead   | 2011_2012 | 2011 | 2012 | 76.09877 | E08 |
| E08000037 Gateshead   | 2012_2013 | 2012 | 2013 | 181.8797 | E08 |
| E08000037 Gateshead   | 2013_2014 | 2013 | 2014 | 311.96   | E08 |
| E08000037 Gateshead   | 2014_2015 | 2014 | 2015 | 403.8914 | E08 |
| E08000037 Gateshead   | 2015_2016 | 2015 | 2016 | 486.9812 | E08 |
| S12000046 Glasgow Ci  | 2011_2012 | 2011 | 2012 | 77.35911 | S12 |
| S12000046 Glasgow Ci  | 2012_2013 | 2012 | 2013 | 182.0734 | S12 |
| S12000046 Glasgow Ci  | 2013_2014 | 2013 | 2014 | 291.5607 | S12 |

|                                 |      |      |          |     |
|---------------------------------|------|------|----------|-----|
| S12000046 Glasgow Ci 2014_2015  | 2014 | 2015 | 392.763  | S12 |
| S12000046 Glasgow Ci 2015_2016  | 2015 | 2016 | 483.002  | S12 |
| E10000013 Gloucester: 2011_2012 | 2011 | 2012 | 58.00083 | E10 |
| E10000013 Gloucester: 2012_2013 | 2012 | 2013 | 142.8868 | E10 |
| E10000013 Gloucester: 2013_2014 | 2013 | 2014 | 236.1382 | E10 |
| E10000013 Gloucester: 2014_2015 | 2014 | 2015 | 300.6168 | E10 |
| E10000013 Gloucester: 2015_2016 | 2015 | 2016 | 356.744  | E10 |
| E09000011 Greenwich 2011_2012   | 2011 | 2012 | 69.86399 | E09 |
| E09000011 Greenwich 2012_2013   | 2012 | 2013 | 170.5425 | E09 |
| E09000011 Greenwich 2013_2014   | 2013 | 2014 | 306.0336 | E09 |
| E09000011 Greenwich 2014_2015   | 2014 | 2015 | 389.7764 | E09 |
| E09000011 Greenwich 2015_2016   | 2015 | 2016 | 464.437  | E09 |
| W0600000 Gwynedd / 2011_2012    | 2011 | 2012 | 67.3773  | W06 |
| W0600000 Gwynedd / 2012_2013    | 2012 | 2013 | 161.4785 | W06 |
| W0600000 Gwynedd / 2013_2014    | 2013 | 2014 | 265.643  | W06 |
| W0600000 Gwynedd / 2014_2015    | 2014 | 2015 | 343.209  | W06 |
| W0600000 Gwynedd / 2015_2016    | 2015 | 2016 | 412.5636 | W06 |
| E09000012 Hackney 2011_2012     | 2011 | 2012 | 96.89539 | E09 |
| E09000012 Hackney 2012_2013     | 2012 | 2013 | 236.6337 | E09 |
| E09000012 Hackney 2013_2014     | 2013 | 2014 | 403.5617 | E09 |
| E09000012 Hackney 2014_2015     | 2014 | 2015 | 513.198  | E09 |
| E09000012 Hackney 2015_2016     | 2015 | 2016 | 611.7458 | E09 |
| E06000006 Halton UA 2011_2012   | 2011 | 2012 | 87.78203 | E06 |
| E06000006 Halton UA 2012_2013   | 2012 | 2013 | 210.0593 | E06 |
| E06000006 Halton UA 2013_2014   | 2013 | 2014 | 373.4558 | E06 |
| E06000006 Halton UA 2014_2015   | 2014 | 2015 | 479.059  | E06 |
| E06000006 Halton UA 2015_2016   | 2015 | 2016 | 575.225  | E06 |
| E09000013 Hammersr 2011_2012    | 2011 | 2012 | 62.18839 | E09 |
| E09000013 Hammersr 2012_2013    | 2012 | 2013 | 155.0806 | E09 |
| E09000013 Hammersr 2013_2014    | 2013 | 2014 | 270.4147 | E09 |
| E09000013 Hammersr 2014_2015    | 2014 | 2015 | 350.0511 | E09 |
| E09000013 Hammersr 2015_2016    | 2015 | 2016 | 416.4965 | E09 |
| E10000014 Hampshire 2011_2012   | 2011 | 2012 | 49.9169  | E10 |
| E10000014 Hampshire 2012_2013   | 2012 | 2013 | 125.7972 | E10 |
| E10000014 Hampshire 2013_2014   | 2013 | 2014 | 218.7928 | E10 |
| E10000014 Hampshire 2014_2015   | 2014 | 2015 | 274.5981 | E10 |
| E10000014 Hampshire 2015_2016   | 2015 | 2016 | 323.444  | E10 |
| E09000014 Haringey 2011_2012    | 2011 | 2012 | 94.8552  | E09 |
| E09000014 Haringey 2012_2013    | 2012 | 2013 | 231.4105 | E09 |
| E09000014 Haringey 2013_2014    | 2013 | 2014 | 404.9458 | E09 |
| E09000014 Haringey 2014_2015    | 2014 | 2015 | 520.7446 | E09 |
| E09000014 Haringey 2015_2016    | 2015 | 2016 | 624.0131 | E09 |
| E09000015 Harrow 2011_2012      | 2011 | 2012 | 73.07471 | E09 |
| E09000015 Harrow 2012_2013      | 2012 | 2013 | 181.5304 | E09 |
| E09000015 Harrow 2013_2014      | 2013 | 2014 | 315.8757 | E09 |
| E09000015 Harrow 2014_2015      | 2014 | 2015 | 402.8296 | E09 |
| E09000015 Harrow 2015_2016      | 2015 | 2016 | 480.0909 | E09 |



|           |              |           |      |      |          |     |
|-----------|--------------|-----------|------|------|----------|-----|
| E06000001 | Hartlepool   | 2011_2012 | 2011 | 2012 | 104.0031 | E06 |
| E06000001 | Hartlepool   | 2012_2013 | 2012 | 2013 | 249.5384 | E06 |
| E06000001 | Hartlepool   | 2013_2014 | 2013 | 2014 | 423.2226 | E06 |
| E06000001 | Hartlepool   | 2014_2015 | 2014 | 2015 | 547.9994 | E06 |
| E06000001 | Hartlepool   | 2015_2016 | 2015 | 2016 | 661.5406 | E06 |
| E09000016 | Havering     | 2011_2012 | 2011 | 2012 | 62.21169 | E09 |
| E09000016 | Havering     | 2012_2013 | 2012 | 2013 | 154.9131 | E09 |
| E09000016 | Havering     | 2013_2014 | 2013 | 2014 | 270.2131 | E09 |
| E09000016 | Havering     | 2014_2015 | 2014 | 2015 | 341.6109 | E09 |
| E09000016 | Havering     | 2015_2016 | 2015 | 2016 | 404.4364 | E09 |
| E06000019 | Herefordsh   | 2011_2012 | 2011 | 2012 | 61.65162 | E06 |
| E06000019 | Herefordsh   | 2012_2013 | 2012 | 2013 | 148.7496 | E06 |
| E06000019 | Herefordsh   | 2013_2014 | 2013 | 2014 | 249.4239 | E06 |
| E06000019 | Herefordsh   | 2014_2015 | 2014 | 2015 | 317.273  | E06 |
| E06000019 | Herefordsh   | 2015_2016 | 2015 | 2016 | 378.605  | E06 |
| E10000015 | Hertfordsh   | 2011_2012 | 2011 | 2012 | 52.74683 | E10 |
| E10000015 | Hertfordsh   | 2012_2013 | 2012 | 2013 | 133.5155 | E10 |
| E10000015 | Hertfordsh   | 2013_2014 | 2013 | 2014 | 238.4713 | E10 |
| E10000015 | Hertfordsh   | 2014_2015 | 2014 | 2015 | 295.3566 | E10 |
| E10000015 | Hertfordsh   | 2015_2016 | 2015 | 2016 | 344.164  | E10 |
| S12000017 | Highland     | 2011_2012 | 2011 | 2012 | 56.98902 | S12 |
| S12000017 | Highland     | 2012_2013 | 2012 | 2013 | 137.5004 | S12 |
| S12000017 | Highland     | 2013_2014 | 2013 | 2014 | 222.6453 | S12 |
| S12000017 | Highland     | 2014_2015 | 2014 | 2015 | 290.3541 | S12 |
| S12000017 | Highland     | 2015_2016 | 2015 | 2016 | 350.3888 | S12 |
| E09000017 | Hillingdon   | 2011_2012 | 2011 | 2012 | 68.14352 | E09 |
| E09000017 | Hillingdon   | 2012_2013 | 2012 | 2013 | 169.735  | E09 |
| E09000017 | Hillingdon   | 2013_2014 | 2013 | 2014 | 295.1577 | E09 |
| E09000017 | Hillingdon   | 2014_2015 | 2014 | 2015 | 374.4186 | E09 |
| E09000017 | Hillingdon   | 2015_2016 | 2015 | 2016 | 444.623  | E09 |
| E09000018 | Hounslow     | 2011_2012 | 2011 | 2012 | 73.98907 | E09 |
| E09000018 | Hounslow     | 2012_2013 | 2012 | 2013 | 182.6401 | E09 |
| E09000018 | Hounslow     | 2013_2014 | 2013 | 2014 | 305.3449 | E09 |
| E09000018 | Hounslow     | 2014_2015 | 2014 | 2015 | 389.7819 | E09 |
| E09000018 | Hounslow     | 2015_2016 | 2015 | 2016 | 464.2712 | E09 |
| S12000018 | Inverclyde   | 2011_2012 | 2011 | 2012 | 84.00818 | S12 |
| S12000018 | Inverclyde   | 2012_2013 | 2012 | 2013 | 199.3092 | S12 |
| S12000018 | Inverclyde   | 2013_2014 | 2013 | 2014 | 317.9642 | S12 |
| S12000018 | Inverclyde   | 2014_2015 | 2014 | 2015 | 425.0313 | S12 |
| S12000018 | Inverclyde   | 2015_2016 | 2015 | 2016 | 521.2841 | S12 |
| W0600000  | Isle of Angl | 2011_2012 | 2011 | 2012 | 79.98089 | W06 |
| W0600000  | Isle of Angl | 2012_2013 | 2012 | 2013 | 191.8444 | W06 |
| W0600000  | Isle of Angl | 2013_2014 | 2013 | 2014 | 313.0173 | W06 |
| W0600000  | Isle of Angl | 2014_2015 | 2014 | 2015 | 406.5701 | W06 |
| W0600000  | Isle of Angl | 2015_2016 | 2015 | 2016 | 490.1358 | W06 |
| E06000046 | Isle of Wigl | 2011_2012 | 2011 | 2012 | 89.853   | E06 |
| E06000046 | Isle of Wigl | 2012_2013 | 2012 | 2013 | 215.8595 | E06 |

|                                          |      |      |          |     |
|------------------------------------------|------|------|----------|-----|
| E06000046 Isle of Wight 2013_2014        | 2013 | 2014 | 355.6224 | E06 |
| E06000046 Isle of Wight 2014_2015        | 2014 | 2015 | 457.8334 | E06 |
| E06000046 Isle of Wight 2015_2016        | 2015 | 2016 | 552.557  | E06 |
| E09000019 Islington 2011_2012            | 2011 | 2012 | 65.96751 | E09 |
| E09000019 Islington 2012_2013            | 2012 | 2013 | 162.5472 | E09 |
| E09000019 Islington 2013_2014            | 2013 | 2014 | 284.0343 | E09 |
| E09000019 Islington 2014_2015            | 2014 | 2015 | 362.3668 | E09 |
| E09000019 Islington 2015_2016            | 2015 | 2016 | 431.2927 | E09 |
| E09000020 Kensington 2011_2012           | 2011 | 2012 | 100.8035 | E09 |
| E09000020 Kensington 2012_2013           | 2012 | 2013 | 254.5367 | E09 |
| E09000020 Kensington 2013_2014           | 2013 | 2014 | 378.5497 | E09 |
| E09000020 Kensington 2014_2015           | 2014 | 2015 | 474.3583 | E09 |
| E09000020 Kensington 2015_2016           | 2015 | 2016 | 558.046  | E09 |
| E10000016 Kent 2011_2012                 | 2011 | 2012 | 68.47966 | E10 |
| E10000016 Kent 2012_2013                 | 2012 | 2013 | 168.0549 | E10 |
| E10000016 Kent 2013_2014                 | 2013 | 2014 | 283.8984 | E10 |
| E10000016 Kent 2014_2015                 | 2014 | 2015 | 359.0171 | E10 |
| E10000016 Kent 2015_2016                 | 2015 | 2016 | 425.66   | E10 |
| E06000010 Kingston upon Thames 2011_2012 | 2011 | 2012 | 101.5889 | E06 |
| E06000010 Kingston upon Thames 2012_2013 | 2012 | 2013 | 240.498  | E06 |
| E06000010 Kingston upon Thames 2013_2014 | 2013 | 2014 | 406.8375 | E06 |
| E06000010 Kingston upon Thames 2014_2015 | 2014 | 2015 | 526.2089 | E06 |
| E06000010 Kingston upon Thames 2015_2016 | 2015 | 2016 | 636.1959 | E06 |
| E09000021 Kingston upon Thames 2011_2012 | 2011 | 2012 | 50.90879 | E09 |
| E09000021 Kingston upon Thames 2012_2013 | 2012 | 2013 | 130.4368 | E09 |
| E09000021 Kingston upon Thames 2013_2014 | 2013 | 2014 | 221.1397 | E09 |
| E09000021 Kingston upon Thames 2014_2015 | 2014 | 2015 | 278.7797 | E09 |
| E09000021 Kingston upon Thames 2015_2016 | 2015 | 2016 | 328.2755 | E09 |
| E08000034 Kirkcaldy 2011_2012            | 2011 | 2012 | 81.43883 | E08 |
| E08000034 Kirkcaldy 2012_2013            | 2012 | 2013 | 196.3203 | E08 |
| E08000034 Kirkcaldy 2013_2014            | 2013 | 2014 | 325.5896 | E08 |
| E08000034 Kirkcaldy 2014_2015            | 2014 | 2015 | 415.8729 | E08 |
| E08000034 Kirkcaldy 2015_2016            | 2015 | 2016 | 498.095  | E08 |
| E08000011 Knowsley 2011_2012             | 2011 | 2012 | 104.7576 | E08 |
| E08000011 Knowsley 2012_2013             | 2012 | 2013 | 249.6947 | E08 |
| E08000011 Knowsley 2013_2014             | 2013 | 2014 | 448.2368 | E08 |
| E08000011 Knowsley 2014_2015             | 2014 | 2015 | 577.0588 | E08 |
| E08000011 Knowsley 2015_2016             | 2015 | 2016 | 694.519  | E08 |
| E09000022 Lambeth 2011_2012              | 2011 | 2012 | 69.84183 | E09 |
| E09000022 Lambeth 2012_2013              | 2012 | 2013 | 171.6019 | E09 |
| E09000022 Lambeth 2013_2014              | 2013 | 2014 | 307.8343 | E09 |
| E09000022 Lambeth 2014_2015              | 2014 | 2015 | 392.5687 | E09 |
| E09000022 Lambeth 2015_2016              | 2015 | 2016 | 467.9786 | E09 |
| E10000017 Lancashire 2011_2012           | 2011 | 2012 | 75.7339  | E10 |
| E10000017 Lancashire 2012_2013           | 2012 | 2013 | 183.6775 | E10 |
| E10000017 Lancashire 2013_2014           | 2013 | 2014 | 307.3335 | E10 |
| E10000017 Lancashire 2014_2015           | 2014 | 2015 | 396.5726 | E10 |

|                       |           |      |      |          |     |
|-----------------------|-----------|------|------|----------|-----|
| E10000017 Lancashire  | 2015_2016 | 2015 | 2016 | 476.0441 | E10 |
| E08000035 Leeds       | 2011_2012 | 2011 | 2012 | 69.98047 | E08 |
| E08000035 Leeds       | 2012_2013 | 2012 | 2013 | 169.1837 | E08 |
| E08000035 Leeds       | 2013_2014 | 2013 | 2014 | 294.7991 | E08 |
| E08000035 Leeds       | 2014_2015 | 2014 | 2015 | 375.9268 | E08 |
| E08000035 Leeds       | 2015_2016 | 2015 | 2016 | 449.6377 | E08 |
| E06000016 Leicester U | 2011_2012 | 2011 | 2012 | 87.90466 | E06 |
| E06000016 Leicester U | 2012_2013 | 2012 | 2013 | 208.5236 | E06 |
| E06000016 Leicester U | 2013_2014 | 2013 | 2014 | 352.1728 | E06 |
| E06000016 Leicester U | 2014_2015 | 2014 | 2015 | 452.2524 | E06 |
| E06000016 Leicester U | 2015_2016 | 2015 | 2016 | 543.63   | E06 |
| E10000018 Leicestersh | 2011_2012 | 2011 | 2012 | 52.8282  | E10 |
| E10000018 Leicestersh | 2012_2013 | 2012 | 2013 | 130.3692 | E10 |
| E10000018 Leicestersh | 2013_2014 | 2013 | 2014 | 221.8026 | E10 |
| E10000018 Leicestersh | 2014_2015 | 2014 | 2015 | 279.1385 | E10 |
| E10000018 Leicestersh | 2015_2016 | 2015 | 2016 | 328.4738 | E10 |
| E09000023 Lewisham    | 2011_2012 | 2011 | 2012 | 90.62292 | E09 |
| E09000023 Lewisham    | 2012_2013 | 2012 | 2013 | 222.6721 | E09 |
| E09000023 Lewisham    | 2013_2014 | 2013 | 2014 | 375.4043 | E09 |
| E09000023 Lewisham    | 2014_2015 | 2014 | 2015 | 478.0396 | E09 |
| E09000023 Lewisham    | 2015_2016 | 2015 | 2016 | 570.058  | E09 |
| E10000019 Lincolnshir | 2011_2012 | 2011 | 2012 | 73.11142 | E10 |
| E10000019 Lincolnshir | 2012_2013 | 2012 | 2013 | 177.1806 | E10 |
| E10000019 Lincolnshir | 2013_2014 | 2013 | 2014 | 293.9485 | E10 |
| E10000019 Lincolnshir | 2014_2015 | 2014 | 2015 | 374.185  | E10 |
| E10000019 Lincolnshir | 2015_2016 | 2015 | 2016 | 447.1539 | E10 |
| E08000012 Liverpool   | 2011_2012 | 2011 | 2012 | 90.915   | E08 |
| E08000012 Liverpool   | 2012_2013 | 2012 | 2013 | 216.3451 | E08 |
| E08000012 Liverpool   | 2013_2014 | 2013 | 2014 | 369.2255 | E08 |
| E08000012 Liverpool   | 2014_2015 | 2014 | 2015 | 481.1081 | E08 |
| E08000012 Liverpool   | 2015_2016 | 2015 | 2016 | 583.3594 | E08 |
| E06000032 Luton UA    | 2011_2012 | 2011 | 2012 | 88.02977 | E06 |
| E06000032 Luton UA    | 2012_2013 | 2012 | 2013 | 212.3224 | E06 |
| E06000032 Luton UA    | 2013_2014 | 2013 | 2014 | 336.0346 | E06 |
| E06000032 Luton UA    | 2014_2015 | 2014 | 2015 | 434.0418 | E06 |
| E06000032 Luton UA    | 2015_2016 | 2015 | 2016 | 521.4864 | E06 |
| E08000003 Mancheste   | 2011_2012 | 2011 | 2012 | 84.15078 | E08 |
| E08000003 Mancheste   | 2012_2013 | 2012 | 2013 | 199.8684 | E08 |
| E08000003 Mancheste   | 2013_2014 | 2013 | 2014 | 342.4639 | E08 |
| E08000003 Mancheste   | 2014_2015 | 2014 | 2015 | 441.2113 | E08 |
| E08000003 Mancheste   | 2015_2016 | 2015 | 2016 | 530.878  | E08 |
| E06000035 Medway U.   | 2011_2012 | 2011 | 2012 | 76.83063 | E06 |
| E06000035 Medway U.   | 2012_2013 | 2012 | 2013 | 187.5455 | E06 |
| E06000035 Medway U.   | 2013_2014 | 2013 | 2014 | 322.4677 | E06 |
| E06000035 Medway U.   | 2014_2015 | 2014 | 2015 | 410.9195 | E06 |
| E06000035 Medway U.   | 2015_2016 | 2015 | 2016 | 491.5243 | E06 |
| W0600002 Merthyr Ty   | 2011_2012 | 2011 | 2012 | 90.22496 | W06 |

|                                |      |      |          |     |
|--------------------------------|------|------|----------|-----|
| W0600002 Merthyr Ty 2012_2013  | 2012 | 2013 | 213.8996 | W06 |
| W0600002 Merthyr Ty 2013_2014  | 2013 | 2014 | 362.9749 | W06 |
| W0600002 Merthyr Ty 2014_2015  | 2014 | 2015 | 478.7023 | W06 |
| W0600002 Merthyr Ty 2015_2016  | 2015 | 2016 | 582.2181 | W06 |
| E09000024 Merton 2011_2012     | 2011 | 2012 | 65.27303 | E09 |
| E09000024 Merton 2012_2013     | 2012 | 2013 | 163.2869 | E09 |
| E09000024 Merton 2013_2014     | 2013 | 2014 | 273.2258 | E09 |
| E09000024 Merton 2014_2015     | 2014 | 2015 | 350.4371 | E09 |
| E09000024 Merton 2015_2016     | 2015 | 2016 | 417.8523 | E09 |
| E06000002 Middlesbrc 2011_2012 | 2011 | 2012 | 108.8495 | E06 |
| E06000002 Middlesbrc 2012_2013 | 2012 | 2013 | 258.9609 | E06 |
| E06000002 Middlesbrc 2013_2014 | 2013 | 2014 | 446.4475 | E06 |
| E06000002 Middlesbrc 2014_2015 | 2014 | 2015 | 574.0277 | E06 |
| E06000002 Middlesbrc 2015_2016 | 2015 | 2016 | 691.7521 | E06 |
| S12000019 Midlothian 2011_2012 | 2011 | 2012 | 63.72545 | S12 |
| S12000019 Midlothian 2012_2013 | 2012 | 2013 | 153.701  | S12 |
| S12000019 Midlothian 2013_2014 | 2013 | 2014 | 248.3889 | S12 |
| S12000019 Midlothian 2014_2015 | 2014 | 2015 | 323.9582 | S12 |
| S12000019 Midlothian 2015_2016 | 2015 | 2016 | 390.6091 | S12 |
| E06000042 Milton Key 2011_2012 | 2011 | 2012 | 73.7827  | E06 |
| E06000042 Milton Key 2012_2013 | 2012 | 2013 | 182.0209 | E06 |
| E06000042 Milton Key 2013_2014 | 2013 | 2014 | 310.2412 | E06 |
| E06000042 Milton Key 2014_2015 | 2014 | 2015 | 391.4944 | E06 |
| E06000042 Milton Key 2015_2016 | 2015 | 2016 | 464.6192 | E06 |
| W0600002 Monmouth 2011_2012    | 2011 | 2012 | 54.99152 | W06 |
| W0600002 Monmouth 2012_2013    | 2012 | 2013 | 134.822  | W06 |
| W0600002 Monmouth 2013_2014    | 2013 | 2014 | 229.4532 | W06 |
| W0600002 Monmouth 2014_2015    | 2014 | 2015 | 294.9695 | W06 |
| W0600002 Monmouth 2015_2016    | 2015 | 2016 | 352.7346 | W06 |
| S12000020 Moray 2011_2012      | 2011 | 2012 | 49.77375 | S12 |
| S12000020 Moray 2012_2013      | 2012 | 2013 | 120.5102 | S12 |
| S12000020 Moray 2013_2014      | 2013 | 2014 | 195.15   | S12 |
| S12000020 Moray 2014_2015      | 2014 | 2015 | 253.2761 | S12 |
| S12000020 Moray 2015_2016      | 2015 | 2016 | 304.9009 | S12 |
| W0600001 Neath Port 2011_2012  | 2011 | 2012 | 85.90359 | W06 |
| W0600001 Neath Port 2012_2013  | 2012 | 2013 | 204.3636 | W06 |
| W0600001 Neath Port 2013_2014  | 2013 | 2014 | 342.8182 | W06 |
| W0600001 Neath Port 2014_2015  | 2014 | 2015 | 450.4337 | W06 |
| W0600001 Neath Port 2015_2016  | 2015 | 2016 | 546.6068 | W06 |
| E08000021 Newcastle 2011_2012  | 2011 | 2012 | 67.66913 | E08 |
| E08000021 Newcastle 2012_2013  | 2012 | 2013 | 160.8605 | E08 |
| E08000021 Newcastle 2013_2014  | 2013 | 2014 | 292.6444 | E08 |
| E08000021 Newcastle 2014_2015  | 2014 | 2015 | 373.9846 | E08 |
| E08000021 Newcastle 2015_2016  | 2015 | 2016 | 448.7411 | E08 |
| E09000025 Newham 2011_2012     | 2011 | 2012 | 86.04421 | E09 |
| E09000025 Newham 2012_2013     | 2012 | 2013 | 206.6794 | E09 |
| E09000025 Newham 2013_2014     | 2013 | 2014 | 346.8109 | E09 |

|           |             |           |      |      |          |     |
|-----------|-------------|-----------|------|------|----------|-----|
| E09000025 | Newham      | 2014_2015 | 2014 | 2015 | 449.7902 | E09 |
| E09000025 | Newham      | 2015_2016 | 2015 | 2016 | 541.8637 | E09 |
| W0600002  | Newport /   | 2011_2012 | 2011 | 2012 | 82.50648 | W06 |
| W0600002  | Newport /   | 2012_2013 | 2012 | 2013 | 197.758  | W06 |
| W0600002  | Newport /   | 2013_2014 | 2013 | 2014 | 329.8979 | W06 |
| W0600002  | Newport /   | 2014_2015 | 2014 | 2015 | 428.1403 | W06 |
| W0600002  | Newport /   | 2015_2016 | 2015 | 2016 | 515.9339 | W06 |
| E10000020 | Norfolk     | 2011_2012 | 2011 | 2012 | 67.54369 | E10 |
| E10000020 | Norfolk     | 2012_2013 | 2012 | 2013 | 163.6096 | E10 |
| E10000020 | Norfolk     | 2013_2014 | 2013 | 2014 | 272.3758 | E10 |
| E10000020 | Norfolk     | 2014_2015 | 2014 | 2015 | 348.9586 | E10 |
| E10000020 | Norfolk     | 2015_2016 | 2015 | 2016 | 416.6541 | E10 |
| S12000021 | North Ayrsl | 2011_2012 | 2011 | 2012 | 86.07615 | S12 |
| S12000021 | North Ayrsl | 2012_2013 | 2012 | 2013 | 205.1617 | S12 |
| S12000021 | North Ayrsl | 2013_2014 | 2013 | 2014 | 327.0629 | S12 |
| S12000021 | North Ayrsl | 2014_2015 | 2014 | 2015 | 434.4278 | S12 |
| S12000021 | North Ayrsl | 2015_2016 | 2015 | 2016 | 530.7258 | S12 |
| E06000012 | North East  | 2011_2012 | 2011 | 2012 | 97.4502  | E06 |
| E06000012 | North East  | 2012_2013 | 2012 | 2013 | 233.2271 | E06 |
| E06000012 | North East  | 2013_2014 | 2013 | 2014 | 395.6131 | E06 |
| E06000012 | North East  | 2014_2015 | 2014 | 2015 | 509.5522 | E06 |
| E06000012 | North East  | 2015_2016 | 2015 | 2016 | 615.1063 | E06 |
| S12000044 | North Lana  | 2011_2012 | 2011 | 2012 | 73.4315  | S12 |
| S12000044 | North Lana  | 2012_2013 | 2012 | 2013 | 175.4836 | S12 |
| S12000044 | North Lana  | 2013_2014 | 2013 | 2014 | 284.6863 | S12 |
| S12000044 | North Lana  | 2014_2015 | 2014 | 2015 | 377.3417 | S12 |
| S12000044 | North Lana  | 2015_2016 | 2015 | 2016 | 459.8259 | S12 |
| E06000013 | North Lincc | 2011_2012 | 2011 | 2012 | 70.28958 | E06 |
| E06000013 | North Lincc | 2012_2013 | 2012 | 2013 | 170.4951 | E06 |
| E06000013 | North Lincc | 2013_2014 | 2013 | 2014 | 289.0155 | E06 |
| E06000013 | North Lincc | 2014_2015 | 2014 | 2015 | 370.9816 | E06 |
| E06000013 | North Lincc | 2015_2016 | 2015 | 2016 | 444.7349 | E06 |
| E06000024 | North Somr  | 2011_2012 | 2011 | 2012 | 69.43402 | E06 |
| E06000024 | North Somr  | 2012_2013 | 2012 | 2013 | 170.7359 | E06 |
| E06000024 | North Somr  | 2013_2014 | 2013 | 2014 | 288.5537 | E06 |
| E06000024 | North Somr  | 2014_2015 | 2014 | 2015 | 369.4702 | E06 |
| E06000024 | North Somr  | 2015_2016 | 2015 | 2016 | 442.0231 | E06 |
| E08000022 | North Tyne  | 2011_2012 | 2011 | 2012 | 76.21262 | E08 |
| E08000022 | North Tyne  | 2012_2013 | 2012 | 2013 | 183.4302 | E08 |
| E08000022 | North Tyne  | 2013_2014 | 2013 | 2014 | 309.7144 | E08 |
| E08000022 | North Tyne  | 2014_2015 | 2014 | 2015 | 397.9357 | E08 |
| E08000022 | North Tyne  | 2015_2016 | 2015 | 2016 | 477.5165 | E08 |
| E10000023 | North York  | 2011_2012 | 2011 | 2012 | 57.90978 | E10 |
| E10000023 | North York  | 2012_2013 | 2012 | 2013 | 143.0225 | E10 |
| E10000023 | North York  | 2013_2014 | 2013 | 2014 | 238.2456 | E10 |
| E10000023 | North York  | 2014_2015 | 2014 | 2015 | 305.4236 | E10 |
| E10000023 | North York  | 2015_2016 | 2015 | 2016 | 365.5552 | E10 |

|                                 |      |      |          |     |
|---------------------------------|------|------|----------|-----|
| E10000021 Northampt 2011_2012   | 2011 | 2012 | 67.49261 | E10 |
| E10000021 Northampt 2012_2013   | 2012 | 2013 | 165.4318 | E10 |
| E10000021 Northampt 2013_2014   | 2013 | 2014 | 282.7248 | E10 |
| E10000021 Northampt 2014_2015   | 2014 | 2015 | 356.4002 | E10 |
| E10000021 Northampt 2015_2016   | 2015 | 2016 | 420.3836 | E10 |
| E06000057 Northumbε 2011_2012   | 2011 | 2012 | 70.46279 | E06 |
| E06000057 Northumbε 2012_2013   | 2012 | 2013 | 169.9227 | E06 |
| E06000057 Northumbε 2013_2014   | 2013 | 2014 | 279.5025 | E06 |
| E06000057 Northumbε 2014_2015   | 2014 | 2015 | 361.5442 | E06 |
| E06000057 Northumbε 2015_2016   | 2015 | 2016 | 434.9615 | E06 |
| E06000018 Nottingham 2011_2012  | 2011 | 2012 | 82.36135 | E06 |
| E06000018 Nottingham 2012_2013  | 2012 | 2013 | 195.9559 | E06 |
| E06000018 Nottingham 2013_2014  | 2013 | 2014 | 336.2689 | E06 |
| E06000018 Nottingham 2014_2015  | 2014 | 2015 | 432.7387 | E06 |
| E06000018 Nottingham 2015_2016  | 2015 | 2016 | 521.1075 | E06 |
| E10000024 Nottingham 2011_2012  | 2011 | 2012 | 67.19457 | E10 |
| E10000024 Nottingham 2012_2013  | 2012 | 2013 | 163.7925 | E10 |
| E10000024 Nottingham 2013_2014  | 2013 | 2014 | 272.9209 | E10 |
| E10000024 Nottingham 2014_2015  | 2014 | 2015 | 350.5247 | E10 |
| E10000024 Nottingham 2015_2016  | 2015 | 2016 | 419.1243 | E10 |
| E08000004 Oldham 2011_2012      | 2011 | 2012 | 94.85766 | E08 |
| E08000004 Oldham 2012_2013      | 2012 | 2013 | 226.5231 | E08 |
| E08000004 Oldham 2013_2014      | 2013 | 2014 | 383.1313 | E08 |
| E08000004 Oldham 2014_2015      | 2014 | 2015 | 491.1921 | E08 |
| E08000004 Oldham 2015_2016      | 2015 | 2016 | 589.6502 | E08 |
| S12000023 Orkney Isla 2011_2012 | 2011 | 2012 | 50.33418 | S12 |
| S12000023 Orkney Isla 2012_2013 | 2012 | 2013 | 123.0189 | S12 |
| S12000023 Orkney Isla 2013_2014 | 2013 | 2014 | 198.7799 | S12 |
| S12000023 Orkney Isla 2014_2015 | 2014 | 2015 | 255.8207 | S12 |
| S12000023 Orkney Isla 2015_2016 | 2015 | 2016 | 306.4074 | S12 |
| E10000025 Oxfordshirε 2011_2012 | 2011 | 2012 | 47.28683 | E10 |
| E10000025 Oxfordshirε 2012_2013 | 2012 | 2013 | 119.385  | E10 |
| E10000025 Oxfordshirε 2013_2014 | 2013 | 2014 | 204.7239 | E10 |
| E10000025 Oxfordshirε 2014_2015 | 2014 | 2015 | 256.7745 | E10 |
| E10000025 Oxfordshirε 2015_2016 | 2015 | 2016 | 302.1047 | E10 |
| W0600000 Pembrokes 2011_2012    | 2011 | 2012 | 86.61292 | W06 |
| W0600000 Pembrokes 2012_2013    | 2012 | 2013 | 207.6177 | W06 |
| W0600000 Pembrokes 2013_2014    | 2013 | 2014 | 328.3001 | W06 |
| W0600000 Pembrokes 2014_2015    | 2014 | 2015 | 423.9386 | W06 |
| W0600000 Pembrokes 2015_2016    | 2015 | 2016 | 509.9377 | W06 |
| S12000024 Perth and Ƨ 2011_2012 | 2011 | 2012 | 58.05455 | S12 |
| S12000024 Perth and Ƨ 2012_2013 | 2012 | 2013 | 140.7659 | S12 |
| S12000024 Perth and Ƨ 2013_2014 | 2013 | 2014 | 225.3819 | S12 |
| S12000024 Perth and Ƨ 2014_2015 | 2014 | 2015 | 291.3863 | S12 |
| S12000024 Perth and Ƨ 2015_2016 | 2015 | 2016 | 349.8966 | S12 |
| E06000031 Peterborou 2011_2012  | 2011 | 2012 | 92.52303 | E06 |
| E06000031 Peterborou 2012_2013  | 2012 | 2013 | 222.2562 | E06 |

|                                  |      |      |          |     |
|----------------------------------|------|------|----------|-----|
| E06000031 Peterborough 2013_2014 | 2013 | 2014 | 378.0014 | E06 |
| E06000031 Peterborough 2014_2015 | 2014 | 2015 | 480.9114 | E06 |
| E06000031 Peterborough 2015_2016 | 2015 | 2016 | 574.0068 | E06 |
| E06000026 Plymouth U 2011_2012   | 2011 | 2012 | 78.57528 | E06 |
| E06000026 Plymouth U 2012_2013   | 2012 | 2013 | 188.8782 | E06 |
| E06000026 Plymouth U 2013_2014   | 2013 | 2014 | 319.9227 | E06 |
| E06000026 Plymouth U 2014_2015   | 2014 | 2015 | 412.1821 | E06 |
| E06000026 Plymouth U 2015_2016   | 2015 | 2016 | 496.6559 | E06 |
| E06000044 Portsmouth I 2011_2012 | 2011 | 2012 | 71.29451 | E06 |
| E06000044 Portsmouth I 2012_2013 | 2012 | 2013 | 172.2806 | E06 |
| E06000044 Portsmouth I 2013_2014 | 2013 | 2014 | 289.3565 | E06 |
| E06000044 Portsmouth I 2014_2015 | 2014 | 2015 | 371.3571 | E06 |
| E06000044 Portsmouth I 2015_2016 | 2015 | 2016 | 446.0795 | E06 |
| W0600002 Powys / Po 2011_2012    | 2011 | 2012 | 68.78914 | W06 |
| W0600002 Powys / Po 2012_2013    | 2012 | 2013 | 165.3033 | W06 |
| W0600002 Powys / Po 2013_2014    | 2013 | 2014 | 270.3542 | W06 |
| W0600002 Powys / Po 2014_2015    | 2014 | 2015 | 348.2431 | W06 |
| W0600002 Powys / Po 2015_2016    | 2015 | 2016 | 417.85   | W06 |
| E06000038 Reading UA 2011_2012   | 2011 | 2012 | 68.33492 | E06 |
| E06000038 Reading UA 2012_2013   | 2012 | 2013 | 168.0884 | E06 |
| E06000038 Reading UA 2013_2014   | 2013 | 2014 | 286.8046 | E06 |
| E06000038 Reading UA 2014_2015   | 2014 | 2015 | 366.0263 | E06 |
| E06000038 Reading UA 2015_2016   | 2015 | 2016 | 437.3178 | E06 |
| E09000026 Redbridge 2011_2012    | 2011 | 2012 | 74.14295 | E09 |
| E09000026 Redbridge 2012_2013    | 2012 | 2013 | 183.902  | E09 |
| E09000026 Redbridge 2013_2014    | 2013 | 2014 | 305.0702 | E09 |
| E09000026 Redbridge 2014_2015    | 2014 | 2015 | 393.4406 | E09 |
| E09000026 Redbridge 2015_2016    | 2015 | 2016 | 470.1962 | E09 |
| E06000003 Redcar and 2011_2012   | 2011 | 2012 | 91.05101 | E06 |
| E06000003 Redcar and 2012_2013   | 2012 | 2013 | 217.6244 | E06 |
| E06000003 Redcar and 2013_2014   | 2013 | 2014 | 378.0912 | E06 |
| E06000003 Redcar and 2014_2015   | 2014 | 2015 | 487.4657 | E06 |
| E06000003 Redcar and 2015_2016   | 2015 | 2016 | 587.8992 | E06 |
| S12000038 Renfrewshi 2011_2012   | 2011 | 2012 | 70.87523 | S12 |
| S12000038 Renfrewshi 2012_2013   | 2012 | 2013 | 170.3195 | S12 |
| S12000038 Renfrewshi 2013_2014   | 2013 | 2014 | 274.7393 | S12 |
| S12000038 Renfrewshi 2014_2015   | 2014 | 2015 | 361.7495 | S12 |
| S12000038 Renfrewshi 2015_2016   | 2015 | 2016 | 439.2441 | S12 |
| W0600001 Rhondda, C 2011_2012    | 2011 | 2012 | 86.89907 | W06 |
| W0600001 Rhondda, C 2012_2013    | 2012 | 2013 | 206.8119 | W06 |
| W0600001 Rhondda, C 2013_2014    | 2013 | 2014 | 343.3426 | W06 |
| W0600001 Rhondda, C 2014_2015    | 2014 | 2015 | 453.5819 | W06 |
| W0600001 Rhondda, C 2015_2016    | 2015 | 2016 | 552.4114 | W06 |
| E09000027 Richmond I 2011_2012   | 2011 | 2012 | 42.83081 | E09 |
| E09000027 Richmond I 2012_2013   | 2012 | 2013 | 114.6798 | E09 |
| E09000027 Richmond I 2013_2014   | 2013 | 2014 | 208.3509 | E09 |
| E09000027 Richmond I 2014_2015   | 2014 | 2015 | 257.5561 | E09 |

|                       |           |      |      |          |     |
|-----------------------|-----------|------|------|----------|-----|
| E09000027 Richmond    | 2015_2016 | 2015 | 2016 | 298.8123 | E09 |
| E08000005 Rochdale    | 2011_2012 | 2011 | 2012 | 97.56661 | E08 |
| E08000005 Rochdale    | 2012_2013 | 2012 | 2013 | 233.8267 | E08 |
| E08000005 Rochdale    | 2013_2014 | 2013 | 2014 | 402.5135 | E08 |
| E08000005 Rochdale    | 2014_2015 | 2014 | 2015 | 515.9183 | E08 |
| E08000005 Rochdale    | 2015_2016 | 2015 | 2016 | 619.6276 | E08 |
| E08000018 Rotherham   | 2011_2012 | 2011 | 2012 | 81.33625 | E08 |
| E08000018 Rotherham   | 2012_2013 | 2012 | 2013 | 194.5591 | E08 |
| E08000018 Rotherham   | 2013_2014 | 2013 | 2014 | 329.9527 | E08 |
| E08000018 Rotherham   | 2014_2015 | 2014 | 2015 | 425.3231 | E08 |
| E08000018 Rotherham   | 2015_2016 | 2015 | 2016 | 511.4363 | E08 |
| E06000017 Rutland UA  | 2011_2012 | 2011 | 2012 | 39.73806 | E06 |
| E06000017 Rutland UA  | 2012_2013 | 2012 | 2013 | 100.1583 | E06 |
| E06000017 Rutland UA  | 2013_2014 | 2013 | 2014 | 181.0951 | E06 |
| E06000017 Rutland UA  | 2014_2015 | 2014 | 2015 | 222.5884 | E06 |
| E06000017 Rutland UA  | 2015_2016 | 2015 | 2016 | 259.2031 | E06 |
| E08000006 Salford     | 2011_2012 | 2011 | 2012 | 88.17277 | E08 |
| E08000006 Salford     | 2012_2013 | 2012 | 2013 | 210.9117 | E08 |
| E08000006 Salford     | 2013_2014 | 2013 | 2014 | 359.0845 | E08 |
| E08000006 Salford     | 2014_2015 | 2014 | 2015 | 460.6216 | E08 |
| E08000006 Salford     | 2015_2016 | 2015 | 2016 | 553.0848 | E08 |
| E08000028 Sandwell    | 2011_2012 | 2011 | 2012 | 94.01326 | E08 |
| E08000028 Sandwell    | 2012_2013 | 2012 | 2013 | 223.8123 | E08 |
| E08000028 Sandwell    | 2013_2014 | 2013 | 2014 | 367.375  | E08 |
| E08000028 Sandwell    | 2014_2015 | 2014 | 2015 | 476.4003 | E08 |
| E08000028 Sandwell    | 2015_2016 | 2015 | 2016 | 573.9159 | E08 |
| S12000026 Scottish Bo | 2011_2012 | 2011 | 2012 | 61.55528 | S12 |
| S12000026 Scottish Bo | 2012_2013 | 2012 | 2013 | 148.6558 | S12 |
| S12000026 Scottish Bo | 2013_2014 | 2013 | 2014 | 237.7867 | S12 |
| S12000026 Scottish Bo | 2014_2015 | 2014 | 2015 | 308.7638 | S12 |
| S12000026 Scottish Bo | 2015_2016 | 2015 | 2016 | 371.7214 | S12 |
| E08000014 Sefton      | 2011_2012 | 2011 | 2012 | 85.13622 | E08 |
| E08000014 Sefton      | 2012_2013 | 2012 | 2013 | 204.5042 | E08 |
| E08000014 Sefton      | 2013_2014 | 2013 | 2014 | 352.6822 | E08 |
| E08000014 Sefton      | 2014_2015 | 2014 | 2015 | 454.2812 | E08 |
| E08000014 Sefton      | 2015_2016 | 2015 | 2016 | 547.2967 | E08 |
| E08000019 Sheffield   | 2011_2012 | 2011 | 2012 | 64.99349 | E08 |
| E08000019 Sheffield   | 2012_2013 | 2012 | 2013 | 155.6163 | E08 |
| E08000019 Sheffield   | 2013_2014 | 2013 | 2014 | 273.2432 | E08 |
| E08000019 Sheffield   | 2014_2015 | 2014 | 2015 | 349.8444 | E08 |
| E08000019 Sheffield   | 2015_2016 | 2015 | 2016 | 419.5984 | E08 |
| S12000027 Shetland Is | 2011_2012 | 2011 | 2012 | 34.56737 | S12 |
| S12000027 Shetland Is | 2012_2013 | 2012 | 2013 | 87.7504  | S12 |
| S12000027 Shetland Is | 2013_2014 | 2013 | 2014 | 154.8392 | S12 |
| S12000027 Shetland Is | 2014_2015 | 2014 | 2015 | 197.4697 | S12 |
| S12000027 Shetland Is | 2015_2016 | 2015 | 2016 | 234.2236 | S12 |
| E06000051 Shropshire  | 2011_2012 | 2011 | 2012 | 56.38804 | E06 |



|                                 |      |      |          |     |
|---------------------------------|------|------|----------|-----|
| E06000051 Shropshire 2012_2013  | 2012 | 2013 | 137.1428 | E06 |
| E06000051 Shropshire 2013_2014  | 2013 | 2014 | 227.3664 | E06 |
| E06000051 Shropshire 2014_2015  | 2014 | 2015 | 290.9778 | E06 |
| E06000051 Shropshire 2015_2016  | 2015 | 2016 | 347.396  | E06 |
| E06000039 Slough UA 2011_2012   | 2011 | 2012 | 90.33242 | E06 |
| E06000039 Slough UA 2012_2013   | 2012 | 2013 | 221.7839 | E06 |
| E06000039 Slough UA 2013_2014   | 2013 | 2014 | 372.2273 | E06 |
| E06000039 Slough UA 2014_2015   | 2014 | 2015 | 471.1845 | E06 |
| E06000039 Slough UA 2015_2016   | 2015 | 2016 | 559.0294 | E06 |
| E08000029 Solihull 2011_2012    | 2011 | 2012 | 61.3823  | E08 |
| E08000029 Solihull 2012_2013    | 2012 | 2013 | 152.1842 | E08 |
| E08000029 Solihull 2013_2014    | 2013 | 2014 | 256.7534 | E08 |
| E08000029 Solihull 2014_2015    | 2014 | 2015 | 327.4622 | E08 |
| E08000029 Solihull 2015_2016    | 2015 | 2016 | 389.7537 | E08 |
| E10000027 Somerset 2011_2012    | 2011 | 2012 | 66.77979 | E10 |
| E10000027 Somerset 2012_2013    | 2012 | 2013 | 162.7979 | E10 |
| E10000027 Somerset 2013_2014    | 2013 | 2014 | 274.067  | E10 |
| E10000027 Somerset 2014_2015    | 2014 | 2015 | 348.8533 | E10 |
| E10000027 Somerset 2015_2016    | 2015 | 2016 | 415.485  | E10 |
| S12000028 South Ayrsl 2011_2012 | 2011 | 2012 | 70.91894 | S12 |
| S12000028 South Ayrsl 2012_2013 | 2012 | 2013 | 170.6086 | S12 |
| S12000028 South Ayrsl 2013_2014 | 2013 | 2014 | 274.8336 | S12 |
| S12000028 South Ayrsl 2014_2015 | 2014 | 2015 | 362.8444 | S12 |
| S12000028 South Ayrsl 2015_2016 | 2015 | 2016 | 441.4147 | S12 |
| E06000025 South Glou 2011_2012  | 2011 | 2012 | 52.70222 | E06 |
| E06000025 South Glou 2012_2013  | 2012 | 2013 | 130.8712 | E06 |
| E06000025 South Glou 2013_2014  | 2013 | 2014 | 224.8901 | E06 |
| E06000025 South Glou 2014_2015  | 2014 | 2015 | 282.6407 | E06 |
| E06000025 South Glou 2015_2016  | 2015 | 2016 | 334.1729 | E06 |
| S12000029 South Lana 2011_2012  | 2011 | 2012 | 66.87773 | S12 |
| S12000029 South Lana 2012_2013  | 2012 | 2013 | 161.4579 | S12 |
| S12000029 South Lana 2013_2014  | 2013 | 2014 | 264.3536 | S12 |
| S12000029 South Lana 2014_2015  | 2014 | 2015 | 347.6759 | S12 |
| S12000029 South Lana 2015_2016  | 2015 | 2016 | 421.4482 | S12 |
| E08000023 South Tyne 2011_2012  | 2011 | 2012 | 85.73185 | E08 |
| E08000023 South Tyne 2012_2013  | 2012 | 2013 | 203.7199 | E08 |
| E08000023 South Tyne 2013_2014  | 2013 | 2014 | 375.2772 | E08 |
| E08000023 South Tyne 2014_2015  | 2014 | 2015 | 480.0661 | E08 |
| E08000023 South Tyne 2015_2016  | 2015 | 2016 | 576.9819 | E08 |
| E06000045 Southampt 2011_2012   | 2011 | 2012 | 67.45828 | E06 |
| E06000045 Southampt 2012_2013   | 2012 | 2013 | 162.818  | E06 |
| E06000045 Southampt 2013_2014   | 2013 | 2014 | 281.9783 | E06 |
| E06000045 Southampt 2014_2015   | 2014 | 2015 | 359.6175 | E06 |
| E06000045 Southampt 2015_2016   | 2015 | 2016 | 430.7182 | E06 |
| E06000033 Southend-c 2011_2012  | 2011 | 2012 | 88.30113 | E06 |
| E06000033 Southend-c 2012_2013  | 2012 | 2013 | 214.9983 | E06 |
| E06000033 Southend-c 2013_2014  | 2013 | 2014 | 361.7324 | E06 |

|                                 |      |      |          |     |
|---------------------------------|------|------|----------|-----|
| E06000033 Southend-c 2014_2015  | 2014 | 2015 | 466.0958 | E06 |
| E06000033 Southend-c 2015_2016  | 2015 | 2016 | 561.745  | E06 |
| E09000028 Southwark 2011_2012   | 2011 | 2012 | 65.16012 | E09 |
| E09000028 Southwark 2012_2013   | 2012 | 2013 | 159.4239 | E09 |
| E09000028 Southwark 2013_2014   | 2013 | 2014 | 290.7219 | E09 |
| E09000028 Southwark 2014_2015   | 2014 | 2015 | 369.367  | E09 |
| E09000028 Southwark 2015_2016   | 2015 | 2016 | 439.4935 | E09 |
| E08000013 St. Helens 2011_2012  | 2011 | 2012 | 85.15798 | E08 |
| E08000013 St. Helens 2012_2013  | 2012 | 2013 | 204.5872 | E08 |
| E08000013 St. Helens 2013_2014  | 2013 | 2014 | 363.0553 | E08 |
| E08000013 St. Helens 2014_2015  | 2014 | 2015 | 465.4973 | E08 |
| E08000013 St. Helens 2015_2016  | 2015 | 2016 | 558.5602 | E08 |
| E10000028 Staffordshi 2011_2012 | 2011 | 2012 | 58.59376 | E10 |
| E10000028 Staffordshi 2012_2013 | 2012 | 2013 | 143.9814 | E10 |
| E10000028 Staffordshi 2013_2014 | 2013 | 2014 | 247.3548 | E10 |
| E10000028 Staffordshi 2014_2015 | 2014 | 2015 | 315.3467 | E10 |
| E10000028 Staffordshi 2015_2016 | 2015 | 2016 | 376.7111 | E10 |
| S12000030 Stirling 2011_2012    | 2011 | 2012 | 47.36954 | S12 |
| S12000030 Stirling 2012_2013    | 2012 | 2013 | 115.6196 | S12 |
| S12000030 Stirling 2013_2014    | 2013 | 2014 | 193.3899 | S12 |
| S12000030 Stirling 2014_2015    | 2014 | 2015 | 252.7094 | S12 |
| S12000030 Stirling 2015_2016    | 2015 | 2016 | 304.7416 | S12 |
| E08000007 Stockport 2011_2012   | 2011 | 2012 | 68.41689 | E08 |
| E08000007 Stockport 2012_2013   | 2012 | 2013 | 167.1313 | E08 |
| E08000007 Stockport 2013_2014   | 2013 | 2014 | 275.1101 | E08 |
| E08000007 Stockport 2014_2015   | 2014 | 2015 | 353.5679 | E08 |
| E08000007 Stockport 2015_2016   | 2015 | 2016 | 423.3023 | E08 |
| E06000004 Stockton-o 2011_2012  | 2011 | 2012 | 82.11397 | E06 |
| E06000004 Stockton-o 2012_2013  | 2012 | 2013 | 198.0409 | E06 |
| E06000004 Stockton-o 2013_2014  | 2013 | 2014 | 341.5422 | E06 |
| E06000004 Stockton-o 2014_2015  | 2014 | 2015 | 437.5855 | E06 |
| E06000004 Stockton-o 2015_2016  | 2015 | 2016 | 525.2553 | E06 |
| E06000021 Stoke-on-T 2011_2012  | 2011 | 2012 | 95.02264 | E06 |
| E06000021 Stoke-on-T 2012_2013  | 2012 | 2013 | 226.044  | E06 |
| E06000021 Stoke-on-T 2013_2014  | 2013 | 2014 | 392.4898 | E06 |
| E06000021 Stoke-on-T 2014_2015  | 2014 | 2015 | 503.8728 | E06 |
| E06000021 Stoke-on-T 2015_2016  | 2015 | 2016 | 606.0086 | E06 |
| E10000029 Suffolk 2011_2012     | 2011 | 2012 | 62.02006 | E10 |
| E10000029 Suffolk 2012_2013     | 2012 | 2013 | 151.9664 | E10 |
| E10000029 Suffolk 2013_2014     | 2013 | 2014 | 254.7527 | E10 |
| E10000029 Suffolk 2014_2015     | 2014 | 2015 | 324.4919 | E10 |
| E10000029 Suffolk 2015_2016     | 2015 | 2016 | 386.8645 | E10 |
| E08000024 Sunderland 2011_2012  | 2011 | 2012 | 89.45692 | E08 |
| E08000024 Sunderland 2012_2013  | 2012 | 2013 | 213.5771 | E08 |
| E08000024 Sunderland 2013_2014  | 2013 | 2014 | 360.534  | E08 |
| E08000024 Sunderland 2014_2015  | 2014 | 2015 | 468.6795 | E08 |
| E08000024 Sunderland 2015_2016  | 2015 | 2016 | 566.3101 | E08 |

|                       |           |      |      |          |     |
|-----------------------|-----------|------|------|----------|-----|
| E10000030 Surrey      | 2011_2012 | 2011 | 2012 | 43.10772 | E10 |
| E10000030 Surrey      | 2012_2013 | 2012 | 2013 | 112.1567 | E10 |
| E10000030 Surrey      | 2013_2014 | 2013 | 2014 | 201.4376 | E10 |
| E10000030 Surrey      | 2014_2015 | 2014 | 2015 | 249.398  | E10 |
| E10000030 Surrey      | 2015_2016 | 2015 | 2016 | 289.7704 | E10 |
| E09000029 Sutton      | 2011_2012 | 2011 | 2012 | 63.40611 | E09 |
| E09000029 Sutton      | 2012_2013 | 2012 | 2013 | 158.615  | E09 |
| E09000029 Sutton      | 2013_2014 | 2013 | 2014 | 275.5576 | E09 |
| E09000029 Sutton      | 2014_2015 | 2014 | 2015 | 347.3846 | E09 |
| E09000029 Sutton      | 2015_2016 | 2015 | 2016 | 411.1069 | E09 |
| W0600001 Swansea /    | 2011_2012 | 2011 | 2012 | 76.00648 | W06 |
| W0600001 Swansea /    | 2012_2013 | 2012 | 2013 | 181.5542 | W06 |
| W0600001 Swansea /    | 2013_2014 | 2013 | 2014 | 299.6757 | W06 |
| W0600001 Swansea /    | 2014_2015 | 2014 | 2015 | 390.8943 | W06 |
| W0600001 Swansea /    | 2015_2016 | 2015 | 2016 | 472.5128 | W06 |
| E06000030 Swindon U,  | 2011_2012 | 2011 | 2012 | 67.30642 | E06 |
| E06000030 Swindon U,  | 2012_2013 | 2012 | 2013 | 164.8366 | E06 |
| E06000030 Swindon U,  | 2013_2014 | 2013 | 2014 | 282.2466 | E06 |
| E06000030 Swindon U,  | 2014_2015 | 2014 | 2015 | 357.3558 | E06 |
| E06000030 Swindon U,  | 2015_2016 | 2015 | 2016 | 424.9843 | E06 |
| E08000008 Tameside    | 2011_2012 | 2011 | 2012 | 91.00589 | E08 |
| E08000008 Tameside    | 2012_2013 | 2012 | 2013 | 218.2407 | E08 |
| E08000008 Tameside    | 2013_2014 | 2013 | 2014 | 372.6634 | E08 |
| E08000008 Tameside    | 2014_2015 | 2014 | 2015 | 478.5632 | E08 |
| E08000008 Tameside    | 2015_2016 | 2015 | 2016 | 575.0277 | E08 |
| E06000020 Telford anc | 2011_2012 | 2011 | 2012 | 81.69673 | E06 |
| E06000020 Telford anc | 2012_2013 | 2012 | 2013 | 196.4834 | E06 |
| E06000020 Telford anc | 2013_2014 | 2013 | 2014 | 339.9127 | E06 |
| E06000020 Telford anc | 2014_2015 | 2014 | 2015 | 433.9341 | E06 |
| E06000020 Telford anc | 2015_2016 | 2015 | 2016 | 519.3934 | E06 |
| W0600001 The Vale of  | 2011_2012 | 2011 | 2012 | 72.23051 | W06 |
| W0600001 The Vale of  | 2012_2013 | 2012 | 2013 | 175.8625 | W06 |
| W0600001 The Vale of  | 2013_2014 | 2013 | 2014 | 287.2826 | W06 |
| W0600001 The Vale of  | 2014_2015 | 2014 | 2015 | 370.2661 | W06 |
| W0600001 The Vale of  | 2015_2016 | 2015 | 2016 | 444.6288 | W06 |
| E06000034 Thurrock U  | 2011_2012 | 2011 | 2012 | 74.97569 | E06 |
| E06000034 Thurrock U  | 2012_2013 | 2012 | 2013 | 183.7593 | E06 |
| E06000034 Thurrock U  | 2013_2014 | 2013 | 2014 | 315.6628 | E06 |
| E06000034 Thurrock U  | 2014_2015 | 2014 | 2015 | 399.0518 | E06 |
| E06000034 Thurrock U  | 2015_2016 | 2015 | 2016 | 474.2939 | E06 |
| E06000027 Torbay UA   | 2011_2012 | 2011 | 2012 | 109.4929 | E06 |
| E06000027 Torbay UA   | 2012_2013 | 2012 | 2013 | 261.7862 | E06 |
| E06000027 Torbay UA   | 2013_2014 | 2013 | 2014 | 427.7771 | E06 |
| E06000027 Torbay UA   | 2014_2015 | 2014 | 2015 | 555.9877 | E06 |
| E06000027 Torbay UA   | 2015_2016 | 2015 | 2016 | 675.5944 | E06 |
| W0600002 Torfaen / T  | 2011_2012 | 2011 | 2012 | 80.78854 | W06 |
| W0600002 Torfaen / T  | 2012_2013 | 2012 | 2013 | 193.4031 | W06 |

|                                |      |      |          |     |
|--------------------------------|------|------|----------|-----|
| W0600002 Torfaen / T 2013_2014 | 2013 | 2014 | 332.4333 | W06 |
| W0600002 Torfaen / T 2014_2015 | 2014 | 2015 | 431.0074 | W06 |
| W0600002 Torfaen / T 2015_2016 | 2015 | 2016 | 518.6772 | W06 |
| E09000030 Tower Harr 2011_2012 | 2011 | 2012 | 69.15692 | E09 |
| E09000030 Tower Harr 2012_2013 | 2012 | 2013 | 168.465  | E09 |
| E09000030 Tower Harr 2013_2014 | 2013 | 2014 | 285.2265 | E09 |
| E09000030 Tower Harr 2014_2015 | 2014 | 2015 | 369.7483 | E09 |
| E09000030 Tower Harr 2015_2016 | 2015 | 2016 | 440.7203 | E09 |
| E08000009 Trafford 2011_2012   | 2011 | 2012 | 60.35664 | E08 |
| E08000009 Trafford 2012_2013   | 2012 | 2013 | 148.9559 | E08 |
| E08000009 Trafford 2013_2014   | 2013 | 2014 | 254.6081 | E08 |
| E08000009 Trafford 2014_2015   | 2014 | 2015 | 324.4395 | E08 |
| E08000009 Trafford 2015_2016   | 2015 | 2016 | 385.9323 | E08 |
| E08000036 Wakefield 2011_2012  | 2011 | 2012 | 77.80253 | E08 |
| E08000036 Wakefield 2012_2013  | 2012 | 2013 | 186.0197 | E08 |
| E08000036 Wakefield 2013_2014  | 2013 | 2014 | 329.7957 | E08 |
| E08000036 Wakefield 2014_2015  | 2014 | 2015 | 421.1082 | E08 |
| E08000036 Wakefield 2015_2016  | 2015 | 2016 | 504.4633 | E08 |
| E08000030 Walsall 2011_2012    | 2011 | 2012 | 87.61058 | E08 |
| E08000030 Walsall 2012_2013    | 2012 | 2013 | 208.75   | E08 |
| E08000030 Walsall 2013_2014    | 2013 | 2014 | 367.039  | E08 |
| E08000030 Walsall 2014_2015    | 2014 | 2015 | 468.3432 | E08 |
| E08000030 Walsall 2015_2016    | 2015 | 2016 | 561.1913 | E08 |
| E09000031 Waltham F 2011_2012  | 2011 | 2012 | 85.84875 | E09 |
| E09000031 Waltham F 2012_2013  | 2012 | 2013 | 209.6572 | E09 |
| E09000031 Waltham F 2013_2014  | 2013 | 2014 | 355.2939 | E09 |
| E09000031 Waltham F 2014_2015  | 2014 | 2015 | 457.4347 | E09 |
| E09000031 Waltham F 2015_2016  | 2015 | 2016 | 548.3486 | E09 |
| E09000032 Wandsworth 2011_2012 | 2011 | 2012 | 63.04026 | E09 |
| E09000032 Wandsworth 2012_2013 | 2012 | 2013 | 160.057  | E09 |
| E09000032 Wandsworth 2013_2014 | 2013 | 2014 | 266.673  | E09 |
| E09000032 Wandsworth 2014_2015 | 2014 | 2015 | 337.6307 | E09 |
| E09000032 Wandsworth 2015_2016 | 2015 | 2016 | 398.7198 | E09 |
| E06000007 Warrington 2011_2012 | 2011 | 2012 | 62.11995 | E06 |
| E06000007 Warrington 2012_2013 | 2012 | 2013 | 152.3176 | E06 |
| E06000007 Warrington 2013_2014 | 2013 | 2014 | 257.0257 | E06 |
| E06000007 Warrington 2014_2015 | 2014 | 2015 | 329.0365 | E06 |
| E06000007 Warrington 2015_2016 | 2015 | 2016 | 392.8584 | E06 |
| E10000031 Warwicksh 2011_2012  | 2011 | 2012 | 57.87431 | E10 |
| E10000031 Warwicksh 2012_2013  | 2012 | 2013 | 143.6746 | E10 |
| E10000031 Warwicksh 2013_2014  | 2013 | 2014 | 248.6955 | E10 |
| E10000031 Warwicksh 2014_2015  | 2014 | 2015 | 314.6172 | E10 |
| E10000031 Warwicksh 2015_2016  | 2015 | 2016 | 372.8444 | E10 |
| E06000037 West Berks 2011_2012 | 2011 | 2012 | 45.9571  | E06 |
| E06000037 West Berks 2012_2013 | 2012 | 2013 | 117.3344 | E06 |
| E06000037 West Berks 2013_2014 | 2013 | 2014 | 210.3046 | E06 |
| E06000037 West Berks 2014_2015 | 2014 | 2015 | 261.5848 | E06 |

|                                 |      |      |          |     |
|---------------------------------|------|------|----------|-----|
| E06000037 West Berks 2015_2016  | 2015 | 2016 | 306.0984 | E06 |
| S12000039 West Dunb 2011_2012   | 2011 | 2012 | 78.42495 | S12 |
| S12000039 West Dunb 2012_2013   | 2012 | 2013 | 185.7517 | S12 |
| S12000039 West Dunb 2013_2014   | 2013 | 2014 | 300.3372 | S12 |
| S12000039 West Dunb 2014_2015   | 2014 | 2015 | 401.603  | S12 |
| S12000039 West Dunb 2015_2016   | 2015 | 2016 | 492.0426 | S12 |
| S12000040 West Lothi: 2011_2012 | 2011 | 2012 | 67.25993 | S12 |
| S12000040 West Lothi: 2012_2013 | 2012 | 2013 | 162.7836 | S12 |
| S12000040 West Lothi: 2013_2014 | 2013 | 2014 | 265.4445 | S12 |
| S12000040 West Lothi: 2014_2015 | 2014 | 2015 | 346.7088 | S12 |
| S12000040 West Lothi: 2015_2016 | 2015 | 2016 | 418.2766 | S12 |
| E10000032 West Susse 2011_2012  | 2011 | 2012 | 59.17834 | E10 |
| E10000032 West Susse 2012_2013  | 2012 | 2013 | 146.3287 | E10 |
| E10000032 West Susse 2013_2014  | 2013 | 2014 | 244.8314 | E10 |
| E10000032 West Susse 2014_2015  | 2014 | 2015 | 309.7747 | E10 |
| E10000032 West Susse 2015_2016  | 2015 | 2016 | 365.7669 | E10 |
| E09000033 Westminst: 2011_2012  | 2011 | 2012 | 138.8023 | E09 |
| E09000033 Westminst: 2012_2013  | 2012 | 2013 | 352.601  | E09 |
| E09000033 Westminst: 2013_2014  | 2013 | 2014 | 512.4476 | E09 |
| E09000033 Westminst: 2014_2015  | 2014 | 2015 | 642.0348 | E09 |
| E09000033 Westminst: 2015_2016  | 2015 | 2016 | 753.3525 | E09 |
| E08000010 Wigan 2011_2012       | 2011 | 2012 | 76.87506 | E08 |
| E08000010 Wigan 2012_2013       | 2012 | 2013 | 184.5906 | E08 |
| E08000010 Wigan 2013_2014       | 2013 | 2014 | 323.1133 | E08 |
| E08000010 Wigan 2014_2015       | 2014 | 2015 | 415.1058 | E08 |
| E08000010 Wigan 2015_2016       | 2015 | 2016 | 498.6253 | E08 |
| E06000054 Wiltshire U 2011_2012 | 2011 | 2012 | 52.3725  | E06 |
| E06000054 Wiltshire U 2012_2013 | 2012 | 2013 | 129.1175 | E06 |
| E06000054 Wiltshire U 2013_2014 | 2013 | 2014 | 226.0256 | E06 |
| E06000054 Wiltshire U 2014_2015 | 2014 | 2015 | 283.4053 | E06 |
| E06000054 Wiltshire U 2015_2016 | 2015 | 2016 | 334.8727 | E06 |
| E06000040 Windsor ar 2011_2012  | 2011 | 2012 | 40.92195 | E06 |
| E06000040 Windsor ar 2012_2013  | 2012 | 2013 | 108.1541 | E06 |
| E06000040 Windsor ar 2013_2014  | 2013 | 2014 | 199.377  | E06 |
| E06000040 Windsor ar 2014_2015  | 2014 | 2015 | 246.1995 | E06 |
| E06000040 Windsor ar 2015_2016  | 2015 | 2016 | 285.6073 | E06 |
| E08000015 Wirral 2011_2012      | 2011 | 2012 | 92.16552 | E08 |
| E08000015 Wirral 2012_2013      | 2012 | 2013 | 222.0522 | E08 |
| E08000015 Wirral 2013_2014      | 2013 | 2014 | 383.3389 | E08 |
| E08000015 Wirral 2014_2015      | 2014 | 2015 | 493.4938 | E08 |
| E08000015 Wirral 2015_2016      | 2015 | 2016 | 594.2761 | E08 |
| E06000041 Wokinghan 2011_2012   | 2011 | 2012 | 35.84025 | E06 |
| E06000041 Wokinghan 2012_2013   | 2012 | 2013 | 95.7601  | E06 |
| E06000041 Wokinghan 2013_2014   | 2013 | 2014 | 174.456  | E06 |
| E06000041 Wokinghan 2014_2015   | 2014 | 2015 | 214.5759 | E06 |
| E06000041 Wokinghan 2015_2016   | 2015 | 2016 | 248.1859 | E06 |
| E08000031 Wolverhar 2011_2012   | 2011 | 2012 | 90.71217 | E08 |

|                                   |      |      |          |     |
|-----------------------------------|------|------|----------|-----|
| E08000031 Wolverhampton 2012_2013 | 2012 | 2013 | 215.757  | E08 |
| E08000031 Wolverhampton 2013_2014 | 2013 | 2014 | 385.2537 | E08 |
| E08000031 Wolverhampton 2014_2015 | 2014 | 2015 | 493.2077 | E08 |
| E08000031 Wolverhampton 2015_2016 | 2015 | 2016 | 593.0287 | E08 |
| E10000034 Worcester 2011_2012     | 2011 | 2012 | 59.99445 | E10 |
| E10000034 Worcester 2012_2013     | 2012 | 2013 | 146.9737 | E10 |
| E10000034 Worcester 2013_2014     | 2013 | 2014 | 250.1024 | E10 |
| E10000034 Worcester 2014_2015     | 2014 | 2015 | 318.367  | E10 |
| E10000034 Worcester 2015_2016     | 2015 | 2016 | 379.8137 | E10 |
| W0600000 Wrexham / 2011_2012      | 2011 | 2012 | 77.95037 | W06 |
| W0600000 Wrexham / 2012_2013      | 2012 | 2013 | 187.5049 | W06 |
| W0600000 Wrexham / 2013_2014      | 2013 | 2014 | 310.7351 | W06 |
| W0600000 Wrexham / 2014_2015      | 2014 | 2015 | 399.8664 | W06 |
| W0600000 Wrexham / 2015_2016      | 2015 | 2016 | 479.0541 | W06 |
| E06000014 York UA 2011_2012       | 2011 | 2012 | 47.19522 | E06 |
| E06000014 York UA 2012_2013       | 2012 | 2013 | 116.0534 | E06 |
| E06000014 York UA 2013_2014       | 2013 | 2014 | 201.5015 | E06 |
| E06000014 York UA 2014_2015       | 2014 | 2015 | 253.5132 | E06 |
| E06000014 York UA 2015_2016       | 2015 | 2016 | 300.6348 | E06 |
